# Supplementary material for: Metal-free, base promoted sp2 C–H functionalization in the sulfonamidation of 1,4-naphthoquinones
Source: Royal Society of Chemistry journal article supplement (doi:10.1039/c8ob00818c), 2018-01-01
Supplement: c8ob00818c1.pdf [file c8ob00818c1.pdf]

## Supporting Information

### Metal-free, Base Catalysed $sp^2$ C-H Functionalization in Sulfonamidation of 1,4-Naphthoquinones

Devenderan Ramanathan,<sup>a</sup> Kasi Pitchumani\*<sup>a,b</sup>

<sup>a</sup> School of Chemistry, Madurai Kamaraj University, Madurai-625 021

<sup>b</sup> Centre for green chemistry Process, Madurai Kamaraj university, Madurai-625 021

#### Contents

|   |                                                |    |
|---|------------------------------------------------|----|
| 1 | General Methods and Procedures                 | 2  |
| 2 | Absorption and PL spectra's                    | 3  |
| 3 | Absorption and fluorescence data's             | 4  |
| 4 | Cyclic voltammetry (CV) data's                 | 5  |
| 5 | Characterizations data                         | 6  |
| 6 | <sup>1</sup> H-and <sup>13</sup> C-NMR spectra | 12 |
| 7 | HRMS-ESI spectra                               | 34 |
| 8 | References                                     | 38 |

## Experimental Section

**General methods:** All reactions were carried out under a nitrogen atmosphere, with dry, freshly distilled solvents in anhydrous conditions. All chemicals (1,4-naphthoquinone, Menadione, sulfonyl chlorides, metal salts) were used without further purification as commercially available unless otherwise noted. NMR spectra were registered on Bruker DRX spectrometer operating at 300 & 400 MHz for  $^1\text{H}$  and 75 & 100 MHz for  $^{13}\text{C}$ . All  $^1\text{H}$ - and  $^{13}\text{C}$ -NMR spectra were measured in  $\text{DMSO-d}_6$  and  $\text{CDCl}_3$  with TMS as the internal standard. HRMS-ESI was obtained by using Orbitrap mass spectrometers and ESI-MS was recorded in Thermo Scientific mass spectrometer. All the compounds were purified by column chromatography using silica gel (60-120 mesh). Sulfonyl azides,<sup>17</sup> were prepared according to the published methods.

General procedure for the base-mediated sulfonamidation reaction of 1,4-naphthoquinone (3):

A mixture of 1,4-naphthoquinone 1 (1.0 mmol), 4-methylbenzenesulfonyl azide 2a (1.0 mmol),  $\text{K}_2\text{CO}_3$  (1.0 mmol) DMSO (3.0 mL) were taken in a 15 mL reaction tube under an open-air atmosphere and the reaction tube was placed in a magnetic stirrer. The reaction mixture was stirred at room temperature for 15 minutes. After completion of the reaction, the solvent was removed under vacuum and the reaction mixture was quenched with water (25 mL) and extracted with dichloromethane (15 mL  $\times$  3). The combined organic layers were dried with anhydrous  $\text{Na}_2\text{SO}_4$  and the crude product was purified over a column of silica gel (eluent: petroleum ether/ethyl acetate = 10:5) to afford the desired product N-(1,4-Dioxo-1,4-dihydronaphthalen-2-yl)-4-methylbenzenesulfonamide **3a**.

General procedure for the base mediated sulfonamidation reaction of 2-methyl-1,4-naphthoquinone (Menadione) 5: A mixture of 2-Methyl-1,4-naphthoquinone 4 (1.0 mmol), 4-methylbenzenesulfonyl azide 2a (1.0 mmol),  $\text{K}_2\text{CO}_3$  (1.0 mmol) DMSO (3.0 mL) were taken in a 15 mL reaction tube under an open air atmosphere and the reaction tube was placed in a magnetic stirrer. The reaction mixture was stirred at room temperature for 30 minutes. After completion of the reaction, the solvent was removed under vacuum and the reaction mixture was quenched with water (25 mL) and extracted with dichloromethane (15 mL  $\times$  3). The combined organic layers were dried with anhydrous  $\text{Na}_2\text{SO}_4$  and the crude product was purified over a column of silica gel (eluent: petroleum ether/ethyl

acetate = 10:5) to afford the desired product 4-Methyl-N-(3-methyl-1,4-dioxo-1,4-dihydronaphthalen-2-yl)benzenesulfonamide **5a**.

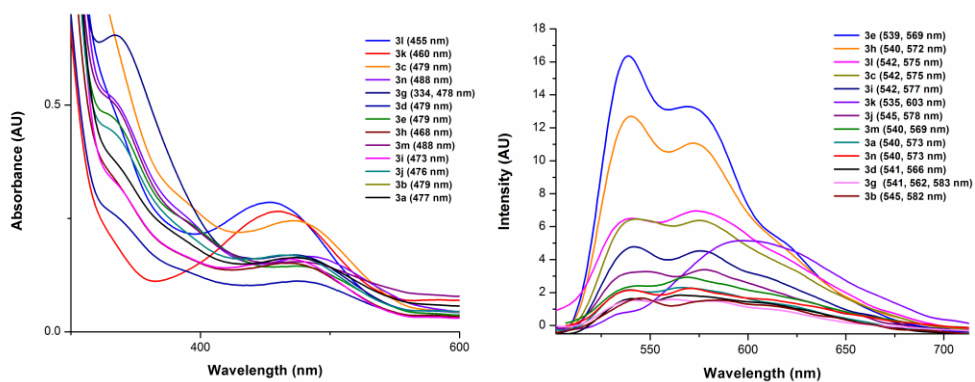

Fig.S2 Absorbance and PL spectrum of (3a-3n)

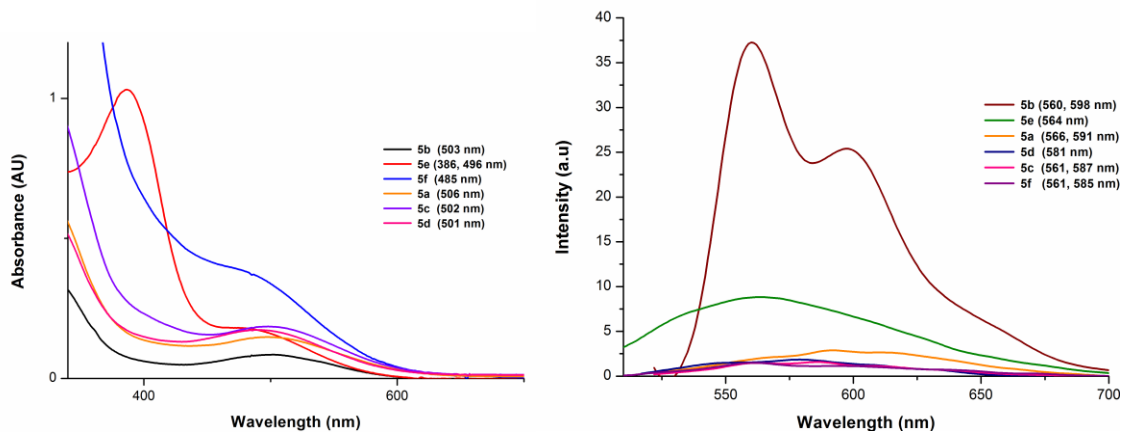

Fig.S2 Absorbance and PL spectra of (5a-5f)

**Table S1. Absorbance and fluorescence data of sulfonamidation derivatives of menadione and 1,4-naphthoquinone.**

| S. No | Compound       | Absorption maximum (nm) | Excitation (nm)<br>( $\lambda_{\text{excitation}}$ ) | Emission Maximum (nm)<br>( $\lambda_{\text{emission}}$ ) |
|-------|----------------|-------------------------|------------------------------------------------------|----------------------------------------------------------|
|       | Naphthoquinone | 331                     | 340                                                  |                                                          |
| 1.    | 3a             | 477                     | 485                                                  | 540, 573                                                 |
| 2.    | 3b             | 479                     | 490                                                  | 545, 582                                                 |
| 3.    | 3c             | 479                     | 490                                                  | 542, 575                                                 |
| 4.    | 3d             | 479                     | 490                                                  | 541, 566                                                 |
| 5.    | 3e             | 479                     | 490                                                  | 539, 569                                                 |
| 6.    | 3g             | 334, 478                | 490                                                  | 541, 562, 583                                            |
| 7.    | 3h             | 468                     | 480                                                  | 540, 572                                                 |
| 8.    | 3i             | 473                     | 480                                                  | 542, 577                                                 |
| 9.    | 3j             | 476                     | 485                                                  | 545, 578                                                 |
| 10.   | 3k             | 460                     | 470                                                  | 535, 603                                                 |
| 11.   | 3l             | 455                     | 465                                                  | 542, 575                                                 |
| 12.   | 3m             | 488                     | 500                                                  | 540, 569                                                 |
| 13.   | 3n             | 488                     | 500                                                  | 540, 573                                                 |
| 14.   | Menadione      | 332                     | 340                                                  |                                                          |
| 15.   | 5a             | 506                     | 515                                                  | 566, 591                                                 |
| 16.   | 5b             | 503                     | 510                                                  | 560, 598                                                 |
| 17.   | 5c             | 502                     | 510                                                  | 561, 587                                                 |
| 18.   | 5d             | 501                     | 510                                                  | 581                                                      |
| 19.   | 5e             | 386, 496                | 505                                                  | 564                                                      |
| 20.   | 5f             | 485                     | 495                                                  | 561, 585                                                 |

Absorbance and PI spectrum are studied in  $1 \times 10^{-4}$  M concentration and solutions are made in DMSO as solvent.

**Table S2.** Electrochemical data measured using cyclic voltammetry (CV) for 1,4-naphthoquinone and menadione sulfonamidation derivatives in selective.

| Compound              | First redox wave |                     | Second redox wave |                     | Third redox wave |                     |
|-----------------------|------------------|---------------------|-------------------|---------------------|------------------|---------------------|
|                       | $E_{pc}/E_{pa}$  | $E_{1/2}(\Delta E)$ | $E_{pc}/E_{pa}$   | $E_{1/2}(\Delta E)$ | $E_{pc}/E_{pa}$  | $E_{1/2}(\Delta E)$ |
| <b>Naphthoquinone</b> | -0.75/-0.41      | -0.58 (343)         | -1.40/-1.04       | -1.22 (365)         | -                | -                   |
| <b>3a</b>             | -0.82/-0.64      | -0.73 (182)         | -1.17/-0.93       | -1.05 (241)         | -1.60/-1.25      | -1.42 (354)         |
| <b>3j</b>             | -0.81/-0.57      | -0.69 (241)         | -1.14/-0.93       | -1.03 (210)         | -1.75/-1.29      | -1.52 (458)         |
| <b>3e</b>             | -0.80/-0.62      | -0.71 (187)         | -1.14/-0.97       | -1.05 (168)         | -1.76/-1.36      | -1.56 (401)         |
| <b>Menadione</b>      | -0.77/-0.47      | -0.62 (303)         | -1.24/-0.88       | -1.06 (356)         | -1.44/-1.07      | -1.25 (369)         |
| <b>5a</b>             | -0.58/-0.76      | -0.67 (177)         | -0.75/-1.15       | -0.94 (405)         | -1.00/-1.58      | -1.29 (579)         |
| <b>5c</b>             | -0.80/-0.59      | -0.69 (212)         | -1.17/-0.96       | -1.06 (206)         | -1.53/-1.22      | -1.37 (311)         |
| <b>5f</b>             | -0.62/-0.80      | -0.71 (178)         | -0.89/-1.05       | -0.97 (164)         | -1.30/-1.25      | -1.27 (56)          |

<sup>[a]</sup>DMSO; I= 0.1m n-Bu<sub>4</sub>NClO<sub>4</sub>. ( $E_{pc}$  and  $E_{pa}$  (V),  $E_{1/2} = (E_{pc} + E_{pa})/2$  (V).  $v = 200 \text{ mV s}^{-1}$ ;  $\Delta E = E_{pa} - E_{pc}$  (mV); reference electrode= KCl(3m)/Ag/AgCl; working electrode= glassy carbon disk of 0.07 cm<sup>2</sup> area; auxiliary electrode= Pt wire.

## Characterization data

|                                                                                                                                  |                                                                                                                                                                                                                                                                                                                                                                                                                                                                                                                                                                                                                                                                                                                                                                    |
|----------------------------------------------------------------------------------------------------------------------------------|--------------------------------------------------------------------------------------------------------------------------------------------------------------------------------------------------------------------------------------------------------------------------------------------------------------------------------------------------------------------------------------------------------------------------------------------------------------------------------------------------------------------------------------------------------------------------------------------------------------------------------------------------------------------------------------------------------------------------------------------------------------------|
| 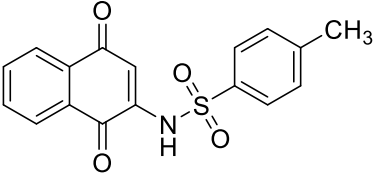 <p style="text-align: center;"><b>3a</b></p>   | <p><i>N</i>-(1,4-Dioxo-1,4-dihydronaphthalen-2-yl)-4-methylbenzenesulfonamide (table 2, <b>3a</b>); Yellow colored solid; m.p 202 °C; yield 71%; <sup>1</sup>H-NMR (300 MHz, CDCl<sub>3</sub>) δ 9.28 (s, 1H), 7.92 (d, <i>J</i> = 10.3 Hz, 2H), 7.81 (d, <i>J</i> = 8.2 Hz, 2H), 7.63 (dd, <i>J</i> = 10.7, 7.5 Hz, 2H), 7.25 (d, <i>J</i> = 8.1 Hz, 2H), 6.66 (s, 1H), 2.32 (s, 3H). <sup>13</sup>C-NMR (75 MHz, DMSO-<i>d</i><sub>6</sub>) δ 183.13, 179.27, 144.34, 141.44, 135.53, 134.47, 133.21, 131.15, 129.99, 129.67, 127.13, 126.14, 125.47, 113.39, 21.08; HRMS (ESI): <i>m/z</i> calculated for C<sub>17</sub>H<sub>14</sub>O<sub>4</sub>NNaS [M+Na]<sup>+</sup> 350.0457, found: 350.0450.</p>                                                       |
|  <p style="text-align: center;"><b>3b</b></p>   | <p><i>N</i>-(1,4-Dioxo-1,4-dihydronaphthalen-2-yl)benzenesulfonamide (table 2, <b>3b</b>); yellow colored solid; m.p &gt;240 °C; yield 70%; <sup>1</sup>H-NMR (300 MHz, DMSO-<i>d</i><sub>6</sub>) δ 10.82 (s, 1H), 8.04 (d, <i>J</i> = 7.8 Hz, 2H), 8.00 (d, <i>J</i> = 7.0 Hz, 1H), 7.92 (d, <i>J</i> = 7.5 Hz, 1H), 7.80 (m, 2H), 7.73 – 7.57 (m, 3H), 6.62 (s, 1H). <sup>13</sup>C-NMR (75 MHz, DMSO-<i>d</i><sub>6</sub>) δ 183.18, 179.25, 141.56, 138.51, 134.53, 133.64, 133.33, 131.14, 130.10, 129.25, 127.03, 126.18, 125.47, 113.58, 79.14, 78.70, 78.26, 40.34, 40.07, 39.79, 39.51, 39.23, 38.95, 38.68; HRMS (ESI): <i>m/z</i> calculated for C<sub>16</sub>H<sub>11</sub>O<sub>4</sub>NNaS [M+Na]<sup>+</sup> 336.0301, found: 336.0298.</p>       |
|  <p style="text-align: center;"><b>3c</b></p> | <p><i>N</i>-(1,4-Dioxo-1,4-dihydronaphthalen-2-yl)biphenyl-4-sulfonamide (table 2, <b>3c</b>); yellow colored solid; m.p 182 °C; yield 82%; <sup>1</sup>H-NMR (300 MHz, CDCl<sub>3</sub>) δ 10.52 (s, 1H), 8.16 (d, 4.5 Hz, 2H), 7.97 (d, <i>J</i> = 6.5 Hz, 2H), 7.84 – 7.71 (m, 5H), 7.61 (d, <i>J</i> = 4.3 Hz, 2H), 7.48 – 7.43 (m, 2H), 6.75 (s, 1H). <sup>13</sup>C NMR (75 MHz, DMSO-<i>d</i><sub>6</sub>) δ 184.31, 180.15, 146.20, 142.73, 138.96, 138.11, 135.60, 134.51, 132.01, 131.17, 129.98, 129.62, 128.74, 128.57, 128.00, 127.86, 127.16, 126.37, 114.40; HRMS (ESI): <i>m/z</i> calculated for C<sub>22</sub>H<sub>16</sub>O<sub>4</sub>NS [M+H]<sup>+</sup> 390.0795, found: 390.0794.</p>                                                     |
|  <p style="text-align: center;"><b>3d</b></p> | <p><i>N</i>-(1,4-Dioxo-1,4-dihydronaphthalen-2-yl)-4-isopropylbenzenesulfonamide (table 2, <b>3d</b>); Yellow colored solid; m.p 201 °C; yield 76%; <sup>1</sup>H-NMR (300 MHz, CDCl<sub>3</sub>) δ 10.12 (s, 1H), 8.05 – 7.97 (m, 2H), 7.94 (d, <i>J</i> = 8.4 Hz, 2H), 7.75 (dd, <i>J</i> = 15.4, 6.6 Hz, 2H), 7.40 (d, <i>J</i> = 8.3 Hz, 2H), 6.73 (s, 1H), 2.98 (dd, <i>J</i> = 13.6, 6.8 Hz, 1H), 1.24 (d, <i>J</i> = 6.9 Hz, 6H). <sup>13</sup>C-NMR (75 MHz, DMSO-<i>d</i><sub>6</sub>) δ 184.26, 180.13, 155.75, 142.74, 136.92, 135.59, 134.48, 131.98, 131.14, 128.37, 128.22, 127.14, 126.35, 114.16, 34.28, 24.16; HRMS (ESI): <i>m/z</i> calculated for C<sub>19</sub>H<sub>18</sub>O<sub>4</sub>NS [M+H]<sup>+</sup> 356.0951, found: 356.0966.</p> |

|                                                                                                                                  |                                                                                                                                                                                                                                                                                                                                                                                                                                                                                                                                                                                                                                                                                                                                                                                                                                                                              |
|----------------------------------------------------------------------------------------------------------------------------------|------------------------------------------------------------------------------------------------------------------------------------------------------------------------------------------------------------------------------------------------------------------------------------------------------------------------------------------------------------------------------------------------------------------------------------------------------------------------------------------------------------------------------------------------------------------------------------------------------------------------------------------------------------------------------------------------------------------------------------------------------------------------------------------------------------------------------------------------------------------------------|
| 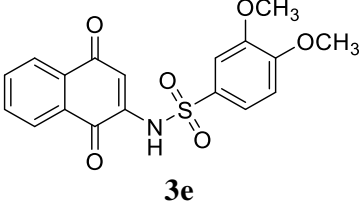 <p style="text-align: center;"><b>3e</b></p>   | <p><b><i>N</i>-(1,4-Dioxo-1,4-dihydronaphthalen-2-yl)-3,4-dimethoxybenzenesulfonamide</b> (table 2, <b>3e</b>); Yellow colored solid; m.p 196 °C; yield 84%; <sup>1</sup>H-NMR (300 MHz, CDCl<sub>3</sub>) δ 9.54 (s, 1H), 8.05 (d, <i>J</i> = 7.4 Hz, 1H), 8.01 (d, <i>J</i> = 7.3 Hz, 1H), 7.71-7.50 (m, 4H), 6.97 (d, <i>J</i> = 8.6 Hz, 1H), 6.75 (s, 1H), 3.93 (s, 3H), 3.92 (s, 3H). <sup>13</sup>C-NMR (75 MHz, DMSO-<i>d</i><sub>6</sub>) δ 184.16, 180.13, 153.93, 149.73, 142.56, 135.49, 134.33, 131.96, 131.02, 130.46, 127.04, 126.28, 122.26, 114.01, 111.78, 110.56, 56.66; HRMS (ESI): <i>m/z</i> calculated for C<sub>18</sub>H<sub>15</sub>NNaO<sub>6</sub>S [M+Na]<sup>+</sup> 396.0512, found: 396.0529.</p>                                                                                                                                             |
|  <p style="text-align: center;"><b>3f</b></p>   | <p><b><i>N</i>-(1,4-Dioxo-1,4-dihydronaphthalen-2-yl)-4-methoxybenzenesulfonamide</b> (table 2, <b>3f</b>); Yellow colored solid; m.p 200 °C; yield 78%; <sup>1</sup>H-NMR (300 MHz, CDCl<sub>3</sub>) δ 9.28 (s, 1H), 7.92 (d, <i>J</i> = 10.3 Hz, 2H), 7.81 (d, <i>J</i> = 8.2 Hz, 2H), 7.63 (dd, <i>J</i> = 10.7, 7.5 Hz, 2H), 7.25 (d, <i>J</i> = 8.1 Hz, 2H), 6.66 (s, 1H), 3.82 (s, 3H). <sup>13</sup>C-NMR (75 MHz, DMSO-<i>d</i><sub>6</sub>) δ 183.13, 179.27, 144.34, 141.44, 135.53, 134.47, 133.21, 131.15, 129.99, 129.67, 127.13, 126.14, 125.47, 113.39, 55.08; ESI-MS: <i>m/z</i> calculated for C<sub>17</sub>H<sub>14</sub>NO<sub>5</sub>S [M+H]<sup>+</sup> 344.05, found: 344.13</p>                                                                                                                                                                     |
|  <p style="text-align: center;"><b>3g</b></p>  | <p><b>5-(Dimethylamino)-<i>N</i>-(1,4-dioxo-1,4-dihydronaphthalen-2-yl)naphthalene-1-sulfonamide</b> (table 2, <b>3g</b>); Colorless solid; m.p 192-194 °C; yield 85%; <sup>1</sup>H-NMR (300 MHz, DMSO-<i>d</i><sub>6</sub>) δ 8.44 (dd, <i>J</i> = 12.2, 8.7 Hz, 2H), 8.34 (d, <i>J</i> = 7.3 Hz, 1H), 7.82 (d, <i>J</i> = 8.8 Hz, 1H), 7.71 (d, <i>J</i> = 8.7 Hz, 1H), 7.64 (d, <i>J</i> = 7.7 Hz, 2H), 7.58 (dd, <i>J</i> = 8.0, 4.0 Hz, 2H), 7.13 (d, <i>J</i> = 7.6 Hz, 1H), 6.44 (s, 1H), 2.71 (s, 6H); <sup>13</sup>C-NMR (75 MHz, DMSO) δ 183.04, 179.21, 151.47, 141.58, 134.47, 133.27, 133.14, 131.18, 131.03, 130.38, 130.03, 129.16, 128.94, 128.57, 126.13, 125.40, 123.21, 118.59, 115.36, 113.58, 44.93; HRMS (ESI): <i>m/z</i> calculated for C<sub>22</sub>H<sub>19</sub>O<sub>4</sub>N<sub>2</sub>NaS [M+Na]<sup>+</sup> 429.0879, found: 429.0868.</p> |
|  <p style="text-align: center;"><b>3h</b></p> | <p><b><i>N</i>-(1,4-Dioxo-1,4-dihydronaphthalen-2-yl)-4-bromobenzenesulfonamide</b> (table 2, <b>3h</b>); Yellow colored solid; m.p 196 °C; yield 70%; <sup>1</sup>H-NMR (300 MHz, DMSO-<i>d</i><sub>6</sub>) δ 10.83 (s, 1H), 7.94 (m, 4H), 7.84 – 7.37 (m, 4H), 6.66 (s, 1H). <sup>13</sup>C-NMR (75 MHz, DMSO) δ 181.65, 177.71, 139.75, 136.67, 135.97, 132.97, 131.71, 129.66, 128.51, 127.11, 125.89, 124.68, 124.02, 112.28. ESI-MS: <i>m/z</i> calculated for C<sub>16</sub>H<sub>11</sub>BrNO<sub>4</sub>S [M+H]<sup>+</sup> 391.9587, found: 391.9594.</p>                                                                                                                                                                                                                                                                                                         |

|                                                                                                                                  |                                                                                                                                                                                                                                                                                                                                                                                                                                                                                                                                                                                                                                                                                                                     |
|----------------------------------------------------------------------------------------------------------------------------------|---------------------------------------------------------------------------------------------------------------------------------------------------------------------------------------------------------------------------------------------------------------------------------------------------------------------------------------------------------------------------------------------------------------------------------------------------------------------------------------------------------------------------------------------------------------------------------------------------------------------------------------------------------------------------------------------------------------------|
| 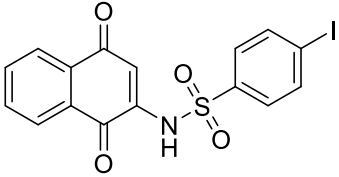 <p style="text-align: center;"><b>3i</b></p>   | <p><b><i>N</i>-(1,4-Dioxo-1,4-dihydronaphthalen-2-yl)-4-iodobenzenesulfonamide</b> (table 2, <b>3i</b>); Yellow colored solid; m.p 204-206 °C; yield 68%; <sup>1</sup>H-NMR (300 MHz, DMSO) δ 8.05 – 7.90 (m, 4H), 7.79 (d, <i>J</i> = 7.8 Hz, 4H), 6.65 (s, 1H). <sup>13</sup>C-NMR (75 MHz, DMSO-<i>d</i><sub>6</sub>) δ 181.58, 177.68, 139.82, 136.32, 132.92, 131.69, 130.77, 129.72, 128.56, 127.38, 126.45, 124.63, 123.96, 112.45. HRMS (ESI): <i>m/z</i> calculated for C<sub>16</sub>H<sub>11</sub>INO<sub>4</sub>S [M+H]<sup>+</sup> 439.9448, found: 439.9452.</p>                                                                                                                                      |
|  <p style="text-align: center;"><b>3j</b></p>   | <p><b><i>N</i>-(1,4-Dioxo-1,4-dihydronaphthalen-2-yl)-4-fluorobenzenesulfonamide</b> (table 2, <b>3j</b>); Yellow colored solid; m.p 190 °C; yield 68%; <sup>1</sup>H-NMR (300 MHz, CDCl<sub>3</sub>) δ 10.88 – 10.40 (m, 1H), 8.10 (dd, <i>J</i> = 8.7, 5.0 Hz, 2H), 8.02 (d, <i>J</i> = 7.4 Hz, 1H), 7.96 (d, <i>J</i> = 8.7 Hz, 1H), 7.83 – 7.70 (m, 2H), 7.32 (t, <i>J</i> = 8.6 Hz, 2H), 6.69 (s, 1H). <sup>13</sup>C-NMR (75 MHz, DMSO-<i>d</i><sub>6</sub>) δ 184.26, 180.19, 142.78, 135.61, 134.51, 132.11, 131.20, 127.17, 126.39, 117.79, 117.49, 114.67; HRMS (ESI): <i>m/z</i> calculated for C<sub>16</sub>H<sub>11</sub>FNO<sub>4</sub>S [M + H]<sup>+</sup> 332.0387, found: 332.0378.</p>          |
|  <p style="text-align: center;"><b>3k</b></p>  | <p><b>2,4,5-Trichloro-<i>N</i>-(1,4-dioxo-1,4-dihydronaphthalen-2-yl)benzenesulfonamide</b> (table 2, <b>3k</b>); Brown colored solid; m.p 186 °C; yield 55%; <sup>1</sup>H NMR (300 MHz, CDCl<sub>3</sub>) δ 8.29 – 8.26 (m, 1H), 8.06 – 8.01 (m, 2H), 7.96 (d, <i>J</i> = 8.3 Hz, 1H), 7.82 (s, 1H), 7.77 (t, <i>J</i> = 6.7 Hz, 2H), 6.59 (s, 1H). <sup>13</sup>C-NMR (101 MHz, DMSO) δ 181.56, 178.93, 173.04, 143.62, 139.20, 135.96, 134.98, 133.87, 132.83, 131.61, 131.22, 129.94, 128.87, 128.64, 128.21, 124.53, 123.69, 118.31, 112.27; HRMS(ESI): <i>m/z</i> calculated for C<sub>16</sub>H<sub>9</sub>Cl<sub>3</sub>NO<sub>4</sub>S [M+H]<sup>+</sup> 415.9312, found: 415.9319.</p>                   |
|  <p style="text-align: center;"><b>3l</b></p> | <p><b><i>N</i>-(1,4-Dioxo-1,4-dihydronaphthalen-2-yl)-4-nitrobenzenesulfonamide</b> (table 2, <b>3l</b>); Yellow colored solid; m.p 194 °C; yield 43%; <sup>1</sup>H-NMR (300 MHz, CDCl<sub>3</sub>) δ 10.88 – 10.40 (m, 1H), 8.10 (dd, <i>J</i> = 8.7, 5.0 Hz, 2H), 8.02 (d, <i>J</i> = 7.4 Hz, 1H), 7.96 (d, <i>J</i> = 8.7 Hz, 1H), 7.83 – 7.70 (m, 2H), 7.32 (t, <i>J</i> = 8.6 Hz, 2H), 6.69 (s, 1H). <sup>13</sup>C-NMR (75 MHz, DMSO-<i>d</i><sub>6</sub>) δ 184.26, 180.19, 142.78, 135.61, 134.51, 132.11, 131.20, 127.17, 126.39, 117.79, 117.49, 114.67; ESI-MS: <i>m/z</i> calculated for C<sub>16</sub>H<sub>10</sub>N<sub>2</sub>O<sub>6</sub>NaS [M + Na]<sup>+</sup> 381.0152, found: 381.0160.</p> |



|                                                                                                                                  |                                                                                                                                                                                                                                                                                                                                                                                                                                                                                                                                                                                                                                                                                                                                                    |
|----------------------------------------------------------------------------------------------------------------------------------|----------------------------------------------------------------------------------------------------------------------------------------------------------------------------------------------------------------------------------------------------------------------------------------------------------------------------------------------------------------------------------------------------------------------------------------------------------------------------------------------------------------------------------------------------------------------------------------------------------------------------------------------------------------------------------------------------------------------------------------------------|
| 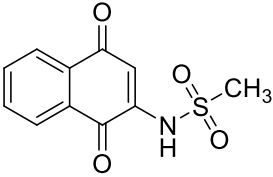 <p style="text-align: center;"><b>3m</b></p>   | <p><i>N</i>-(1,4-Dioxo-1,4-dihydronaphthalen-2-yl)methanesulfonamide (table 2, <b>3m</b>); Yellow colored solid; m.p 178 °C; yield 58%; <sup>1</sup>H-NMR (300 MHz, DMSO-<i>d</i><sub>6</sub>) δ 8.04 (d, <i>J</i> = 7.1 Hz, 1H), 7.98 (d, <i>J</i> = 7.3 Hz, 1H), 7.81 (dd, <i>J</i> = 15.2, 7.4 Hz, 2H), 6.80 (s, 1H), 3.26 (s, 3H). <sup>13</sup>C-NMR (75 MHz, DMSO-<i>d</i><sub>6</sub>) δ 182.03, 178.10, 140.52, 133.15, 132.92, 131.81, 130.11, 128.77, 125.60, 124.89, 124.24, 112.10, 77.44, 77.00, 76.56, 39.17, 38.89, 38.81, 38.61, 38.33, 38.05, 37.78, 37.49; HRMS (ESI): <i>m/z</i> calculated for C<sub>11</sub>H<sub>10</sub>O<sub>4</sub>NS [M + H]<sup>+</sup> 252.0325, found: 252.0324.</p>                                  |
|  <p style="text-align: center;"><b>3n</b></p>   | <p><i>N</i>-(1,4-Dioxo-1,4-dihydronaphthalen-2-yl)cyclopropanesulfonamide (table 2, <b>3n</b>); Yellow colored solid; m.p 172 °C; yield 59%; <sup>1</sup>H-NMR (300 MHz, CDCl<sub>3</sub>) δ 9.96 (s, 1H), 8.08 (d, <i>J</i> = 7.2 Hz, 1H), 8.01 (d, <i>J</i> = 6.7 Hz, 1H), 7.80 (dd, <i>J</i> = 14.5, 7.5 Hz, 2H), 6.85 (s, 1H), 2.94 (dd, <i>J</i> = 8.4, 3.9 Hz, 1H), 1.27 (dd, <i>J</i> = 6.5, 4.1 Hz, 2H), 1.09 (dd, <i>J</i> = 12.2, 6.6 Hz, 2H). <sup>13</sup>C-NMR (75 MHz, DMSO-<i>d</i><sub>6</sub>) δ 184.55, 180.49, 143.33, 135.71, 134.55, 132.19, 131.24, 127.24, 126.41, 114.44, 31.36, 6.37; HRMS (ESI): <i>m/z</i> calculated for C<sub>13</sub> H<sub>12</sub>O<sub>4</sub>NS [M+H]<sup>+</sup> 278.0482, found: 278.0494.</p> |
|  <p style="text-align: center;"><b>5a</b></p> | <p><i>4</i>-Methyl-<i>N</i>-(3-methyl-1,4-dioxo-1,4-dihydronaphthalen-2-yl)benzenesulfonamide (table 3, <b>5a</b>); Yellow colored solid; m.p 207-210 °C; yield 76%; <sup>1</sup>H-NMR (300 MHz, CDCl<sub>3</sub>) δ 9.19 (s, 1H), 8.05 (d, <i>J</i> = 5.0 Hz, 1H), 7.90 (d, <i>J</i> = 4.3 Hz, 2H), 7.71 (dd, <i>J</i> = 14.7, 5.1 Hz, 5H), 2.41 (d, <i>J</i> = 4.5 Hz, 3H), 2.24 (d, <i>J</i> = 4.8 Hz, 3H). <sup>13</sup>C NMR (75 MHz, DMSO-<i>d</i><sub>6</sub>) δ 185.48, 180.98, 143.99, 142.34, 139.76, 139.21, 135.15, 134.93, 132.38, 131.36, 130.28, 127.51, 126.91, 21.91, 14.27; HRMS (ESI): <i>m/z</i> calculated for C<sub>18</sub> H<sub>15</sub>O<sub>4</sub>NNaS [M+Na]<sup>+</sup> 364.0614, found: 364.0614.</p>               |
|  <p style="text-align: center;"><b>5b</b></p> | <p><i>N</i>-(3-Methyl-1,4-dioxo-1,4-dihydronaphthalen-2-yl)benzenesulfonamide (table 3, <b>5b</b>); Yellow colored solid; m.p 186 °C; yield 74%; <sup>1</sup>H NMR (300 MHz, DMSO-<i>d</i><sub>6</sub>) δ 9.88 (s, 1H), 8.00 (d, <i>J</i> = 6.9 Hz, 1H), 7.86 (d, <i>J</i> = 7.8 Hz, 3H), 7.81 – 7.73 (m, 2H), 7.61 (d, <i>J</i> = 7.0 Hz, 1H), 7.53 (t, <i>J</i> = 7.3 Hz, 2H), 2.13 (s, 3H). <sup>13</sup>C-NMR (75 MHz, DMSO-<i>d</i><sub>6</sub>) δ 182.68, 178.21, 139.70, 139.26, 137.11, 132.25, 132.00, 130.83, 129.74, 128.67, 126.97, 124.78, 124.20, 11.59; HRMS (ESI): <i>m/z</i> calculated for C<sub>17</sub>H<sub>13</sub>NNaO<sub>4</sub>S [M+Na]<sup>+</sup> 350.0463, found: 350.0469.</p>                                       |

|                                                                                                                                  |                                                                                                                                                                                                                                                                                                                                                                                                                                                                                                                                                                                                                                                                                                                                                                                                        |
|----------------------------------------------------------------------------------------------------------------------------------|--------------------------------------------------------------------------------------------------------------------------------------------------------------------------------------------------------------------------------------------------------------------------------------------------------------------------------------------------------------------------------------------------------------------------------------------------------------------------------------------------------------------------------------------------------------------------------------------------------------------------------------------------------------------------------------------------------------------------------------------------------------------------------------------------------|
| 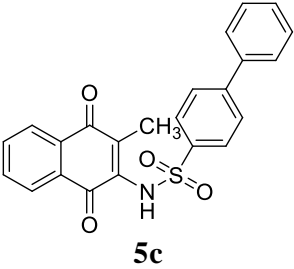 <p style="text-align: center;"><b>5c</b></p>   | <p><b><i>N</i>-(3-Methyl-1,4-dioxo-1,4-dihydronaphthalen-2-yl)biphenyl-4-sulfonamide</b> (table 3, <b>5c</b>); Yellow colored solid; m.p 211 °C; yield 88%; <sup>1</sup>H NMR (300 MHz, DMSO-<i>d</i><sub>6</sub>) δ 10.10 (s, 1H), 7.97 (d, <i>J</i> = 8.3 Hz, 3H), 7.89 (d, <i>J</i> = 8.7 Hz, 3H), 7.85 – 7.78 (m, 2H), 7.75 (d, <i>J</i> = 7.4 Hz, 2H), 7.48 (dd, <i>J</i> = 14.5, 6.9 Hz, 3H), 2.16 (s, 3H). <sup>13</sup>C NMR (75 MHz, CDCl<sub>3</sub>) δ 185.40, 180.99, 144.98, 142.23, 140.88, 139.77, 139.18, 135.12, 134.88, 132.36, 131.36, 129.97, 129.39, 128.16, 128.00, 127.92, 127.87, 127.17, 126.88, 14.22; HRMS (ESI): <i>m/z</i> calculated for C<sub>23</sub>H<sub>17</sub>O<sub>4</sub>NNaS [M+Na]<sup>+</sup> 426.0770, found: 426.0789.</p>                                 |
|  <p style="text-align: center;"><b>5d</b></p>   | <p><b>4-Bromo-N-(3-methyl-1,4-dioxo-1,4-dihydronaphthalen-2-yl)benzenesulfonamide</b> (table 3, <b>5d</b>); Yellow colored solid; m.p 208 °C; yield 78%; <sup>1</sup>H-NMR (300 MHz, CDCl<sub>3</sub>) δ 8.79 (s, 1H), 8.09 (d, <i>J</i> = 7.6 Hz, 1H), 7.92 (d, <i>J</i> = 6.3 Hz, 1H), 7.75 (d, <i>J</i> = 8.0 Hz, 2H), 7.70 (d, <i>J</i> = 8.7 Hz, 1H), 7.60 (d, <i>J</i> = 8.3 Hz, 2H), 7.38 (s, 1H), 2.30 (s, 3H). <sup>13</sup>C-NMR (75 MHz, DMSO-<i>d</i><sub>6</sub>) δ 182.62, 178.24, 139.99, 138.69, 136.91, 132.30, 132.05, 130.04, 129.73, 128.65, 126.75, 124.80, 124.22, 11.53; HRMS (ESI): <i>m/z</i> calculated for C<sub>17</sub>H<sub>13</sub>BrNO<sub>4</sub>S[M+H]<sup>+</sup> 405.9743, found: 405.9755.</p>                                                                    |
|  <p style="text-align: center;"><b>5e</b></p> | <p><b>4-Fluoro-N-(3-methyl-1,4-dioxo-1,4-dihydronaphthalen-2-yl)benzenesulfonamide</b> (table 3, <b>5e</b>); Yellow colored solid; m.p 193 °C; yield 51%; <sup>1</sup>H-NMR (300 MHz, CDCl<sub>3</sub>) δ 8.83 (s, 1H), 8.12 (d, <i>J</i> = 7.6 Hz, 1H), 7.96 (d, <i>J</i> = 6.3 Hz, 1H), 7.78 (d, <i>J</i> = 8.0 Hz, 2H), 7.71 (d, <i>J</i> = 8.7 Hz, 1H), 7.64 (d, <i>J</i> = 8.3 Hz, 2H), 7.40 (s, 1H), 2.34 (s, 3H). <sup>13</sup>C NMR (126 MHz, CDCl<sub>3</sub>) δ 184.56, 180.14, 165.40, 163.40, 142.06, 138.76, 137.50, 134.21, 133.97, 131.63, 130.54, 129.87, 129.79, 129.72, 126.16, 126.01, 116.10, 115.92, 13.43; HRMS (ESI): <i>m/z</i> calculated for C<sub>17</sub>H<sub>13</sub>O<sub>4</sub>NFS [M+H]<sup>+</sup> 346.0544, found: 346.0561.</p>                                   |
|  <p style="text-align: center;"><b>5f</b></p> | <p><b><i>N</i>-(3-Methyl-1,4-dioxo-1,4-dihydronaphthalen-2-yl)-4-nitrobenzenesulfonamide</b> (table 3, <b>5f</b>); Yellow colored solid; m.p 190 °C; yield 63%; <sup>1</sup>H NMR (300 MHz, DMSO-<i>d</i><sub>6</sub>) δ 8.36 (d, <i>J</i> = 8.3 Hz, 2H), 8.13 (d, <i>J</i> = 8.2 Hz, 2H), 8.03 (d, <i>J</i> = 7.4 Hz, 1H), 7.91 (d, <i>J</i> = 8.1 Hz, 1H), 7.86 (d, <i>J</i> = 7.3 Hz, 1H), 7.76 (d, <i>J</i> = 8.1 Hz, 1H), 6.59 (s, 1H), 6.32 (s, 1H), 2.24 (s, 3H). <sup>13</sup>C NMR (75 MHz, CDCl<sub>3</sub>) δ 183.00, 178.76, 148.22, 145.74, 140.56, 137.40, 132.64, 132.31, 130.31, 129.18, 126.76, 124.77, 124.66, 122.46, 111.10, 11.87; HRMS (ESI): <i>m/z</i> calculated for C<sub>17</sub>H<sub>13</sub>N<sub>2</sub>O<sub>6</sub>S [M+H]<sup>+</sup> 373.0489, found: 373.0495.</p> |

|                                                                                                                                |                                                                                                                                                                                                                                                                                                                                                                                                                                                                                                                                                                                                                                                                                |
|--------------------------------------------------------------------------------------------------------------------------------|--------------------------------------------------------------------------------------------------------------------------------------------------------------------------------------------------------------------------------------------------------------------------------------------------------------------------------------------------------------------------------------------------------------------------------------------------------------------------------------------------------------------------------------------------------------------------------------------------------------------------------------------------------------------------------|
| 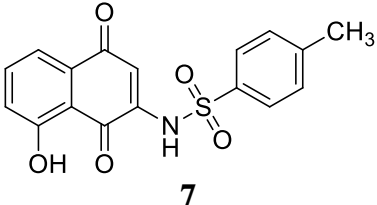 <p style="text-align: center;"><b>7</b></p>  | <p><b><i>N</i>-(8-Hydroxy-1,4-dioxo-1,4-dihydronaphthalen-2-yl)-4-methylbenzenesulfonamide</b> (table 2, <b>7</b>): Yellow solid; yield 76%; <sup>1</sup>H NMR (300 MHz, CDCl<sub>3</sub>): δ 11.81 (s, 1H), 7.75 (d, <i>J</i> = 12.0 Hz, 2H), 7.54 (d, <i>J</i> = 8.0 Hz, 2H), 7.32 (d, <i>J</i> = 12 Hz, 2H), 7.19 (d, <i>J</i> = 8.0 Hz, 1H), 6.86 (s, 2H), 2.39 (s, 3H). <sup>13</sup>C NMR (75 MHz, CDCl<sub>3</sub>) δ 190.19, 184.13, 161.32, 146.12, 139.48, 138.54, 136.46, 135.42, 131.66, 130.19, 127.43, 124.37, 119.03, 114.06, 21.15; ESI-MS: <i>m/z</i> calculated for C<sub>17</sub>H<sub>14</sub>NO<sub>5</sub>S [M+H]<sup>+</sup> 344.05, found: 344.15.</p> |
|  <p style="text-align: center;"><b>8</b></p>  | <p><b>2-Aminonaphthalene-1,4-dione</b> (Scheme 1, <b>8</b>): Orange colored solid; yield (56%) <sup>1</sup>H NMR (500 MHz, CDCl<sub>3</sub>) δ 8.06 (d, <i>J</i> = 11.5, 2H), 7.72 (d, <i>J</i> = 7.6, 1H), 7.63 (d, <i>J</i> = 7.6, 1H), 6.01 (s, 1H), 5.32 (s, 2H); <sup>13</sup>C NMR (126 MHz, CDCl<sub>3</sub>) δ 183.49, 182.01, 149.11, 134.40, 133.45, 131.95, 130.53, 126.03, 125.86, 104.21; (ESI): <i>m/z</i> calculated for C<sub>10</sub>H<sub>7</sub>NO<sub>2</sub> [M+H]<sup>+</sup> 173.04, found: 174.10.</p>                                                                                                                                                 |
|  <p style="text-align: center;"><b>9</b></p> | <p><b>2-Amino-3-methylnaphthalene-1,4-dione</b> (Scheme 1, <b>9</b>): Orange colored solid; yield (60%) <sup>1</sup>H NMR (400 MHz, CDCl<sub>3</sub>) δ 8.08 (d, <i>J</i> = 7.6, 1H), 8.01 (d, <i>J</i> = 7.6, Hz, 1H), 7.68 (t, <i>J</i> = 7.6, 1H), 7.59 (t, <i>J</i> = 7.5, 1H), 5.03 (s, 2H), 2.01 (s, 3H). <sup>13</sup>C NMR (101 MHz, CDCl<sub>3</sub>) δ 182.83, 181.13, 145.32, 134.17, 131.97, 126.15, 125.72, 113.12, 9.17; HRMS (ESI): <i>m/z</i> calculated for C<sub>17</sub>H<sub>13</sub>N<sub>2</sub>O<sub>6</sub>S [M+H]<sup>+</sup> 373.0489, found: 373.0495.</p>                                                                                          |

# $^1\text{H}$ - and $^{13}\text{C}$ -NMR spectra and Mass analysis

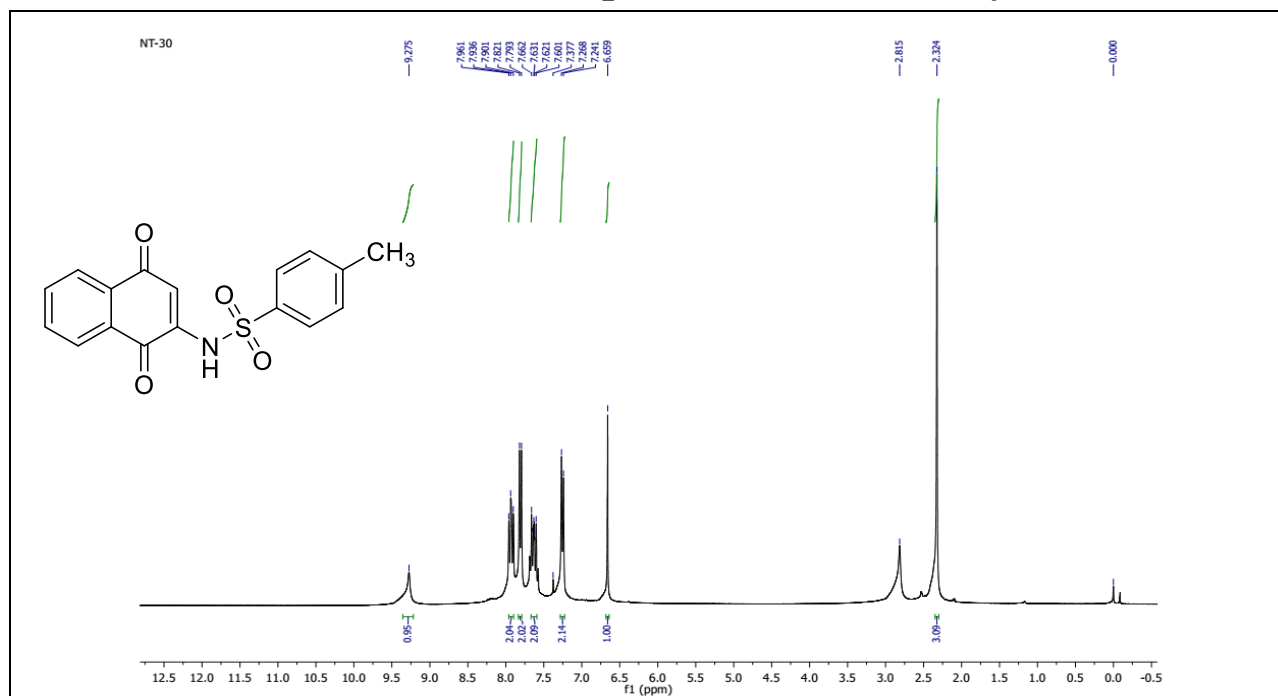

**Fig. 1.**  $^1\text{H}$ -NMR spectrum of *N*-(1,4-dioxo-1,4-dihydronaphthalen-2-yl)-4-methylbenzenesulfonamide (Table 2, **3a**).

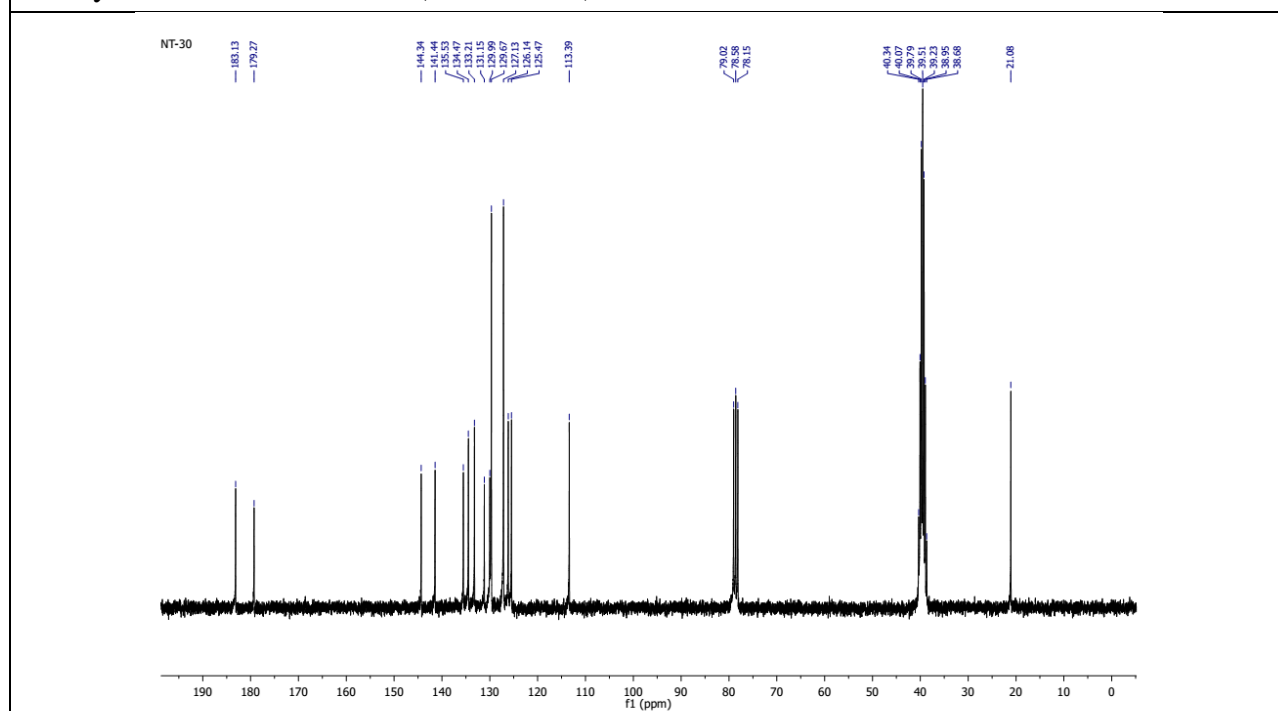

**Fig. 2.**  $^{13}\text{C}$ -NMR spectrum of *N*-(1,4-dioxo-1,4-dihydronaphthalen-2-yl)-4-methylbenzenesulfonamide (Table 2, **3a**).

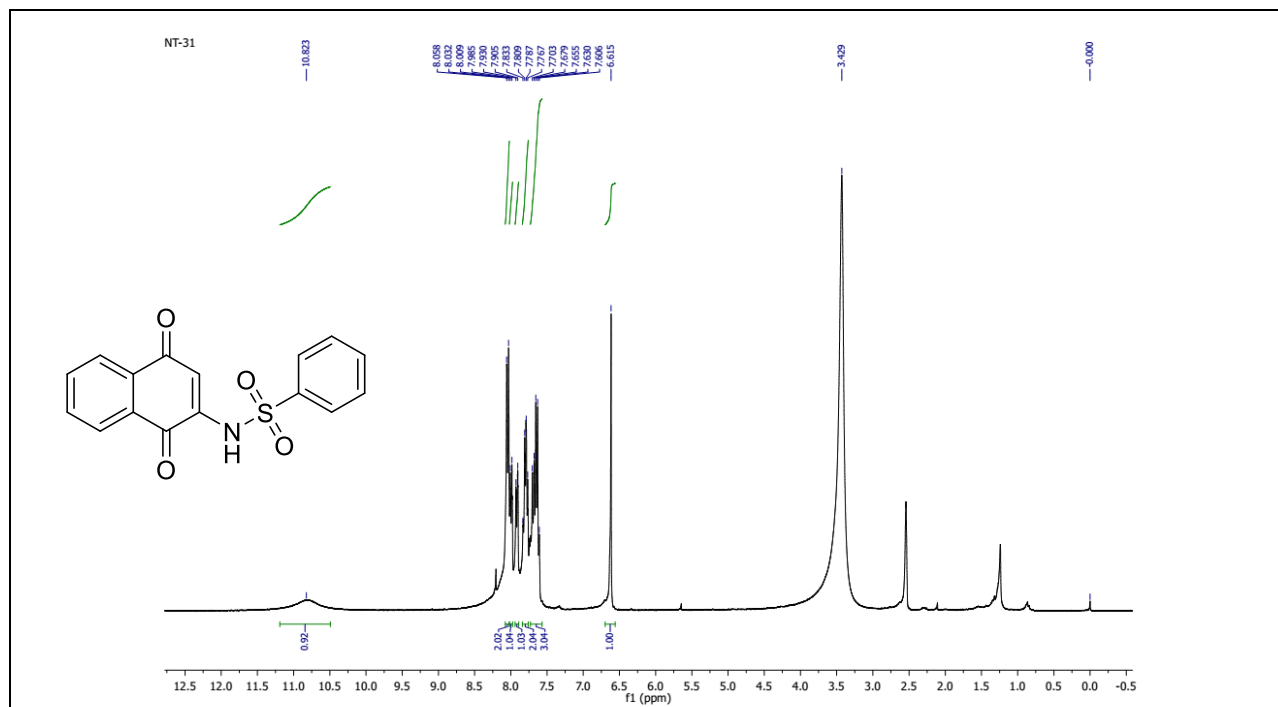

**Fig. 3.** <sup>1</sup>H-NMR spectrum of *N*-(1,4-dioxo-1,4-dihydronaphthalen-2-yl)benzenesulfonamide (Table 2, **3b**).

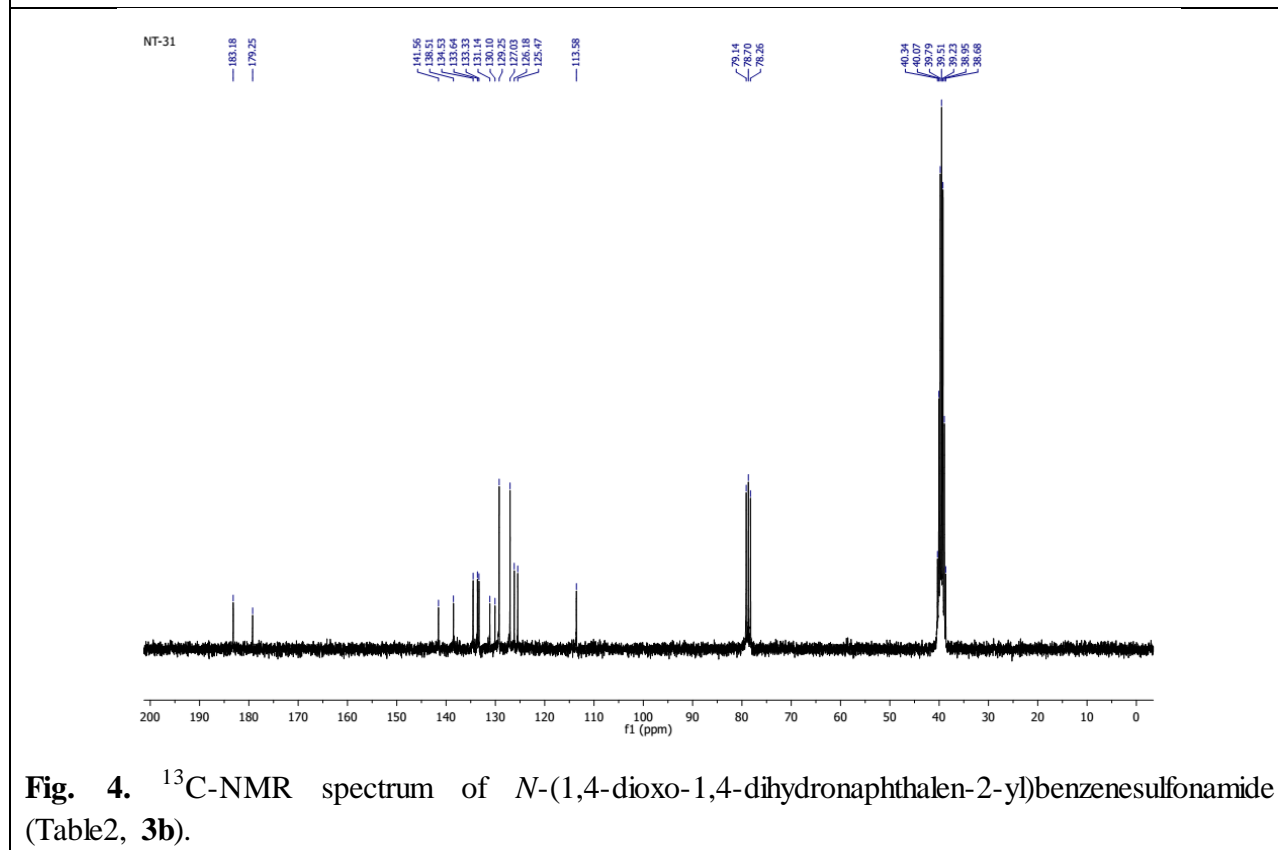

**Fig. 4.** <sup>13</sup>C-NMR spectrum of *N*-(1,4-dioxo-1,4-dihydronaphthalen-2-yl)benzenesulfonamide (Table2, **3b**).

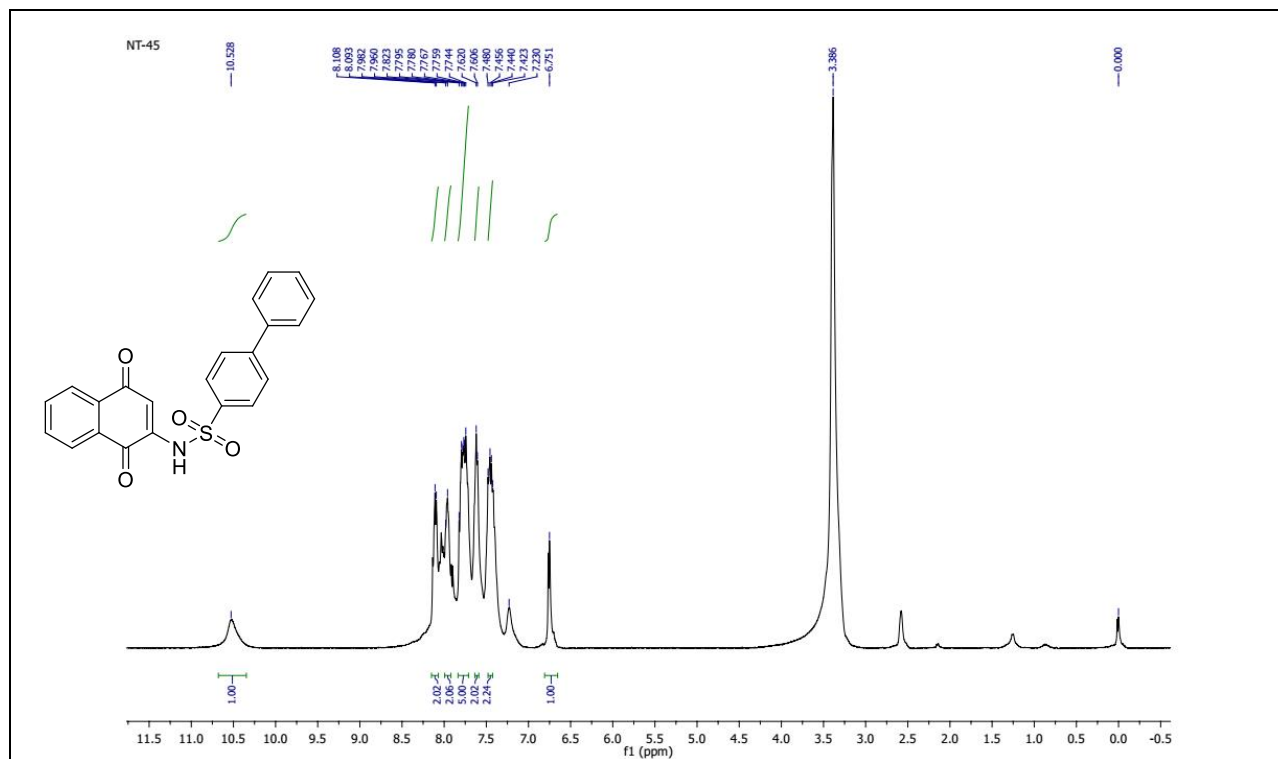

**Fig. 5.** <sup>1</sup>H-NMR spectrum of *N*-(1,4-dioxo-1,4-dihydronaphthalen-2-yl)biphenyl-4-sulfonamide (Table 2, 3c).

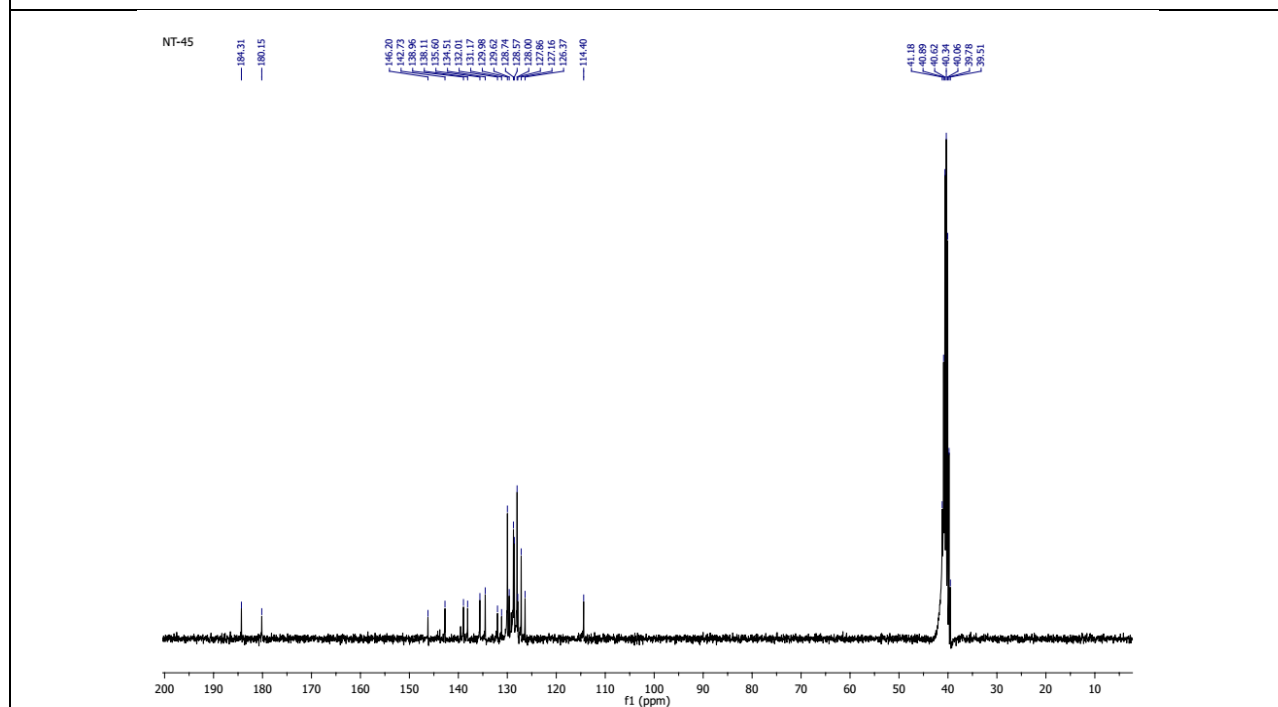

**Fig. 6.** <sup>13</sup>C-NMR spectrum of *N*-(1,4-dioxo-1,4-dihydronaphthalen-2-yl)biphenyl-4-sulfonamide (Table 2, 3c).

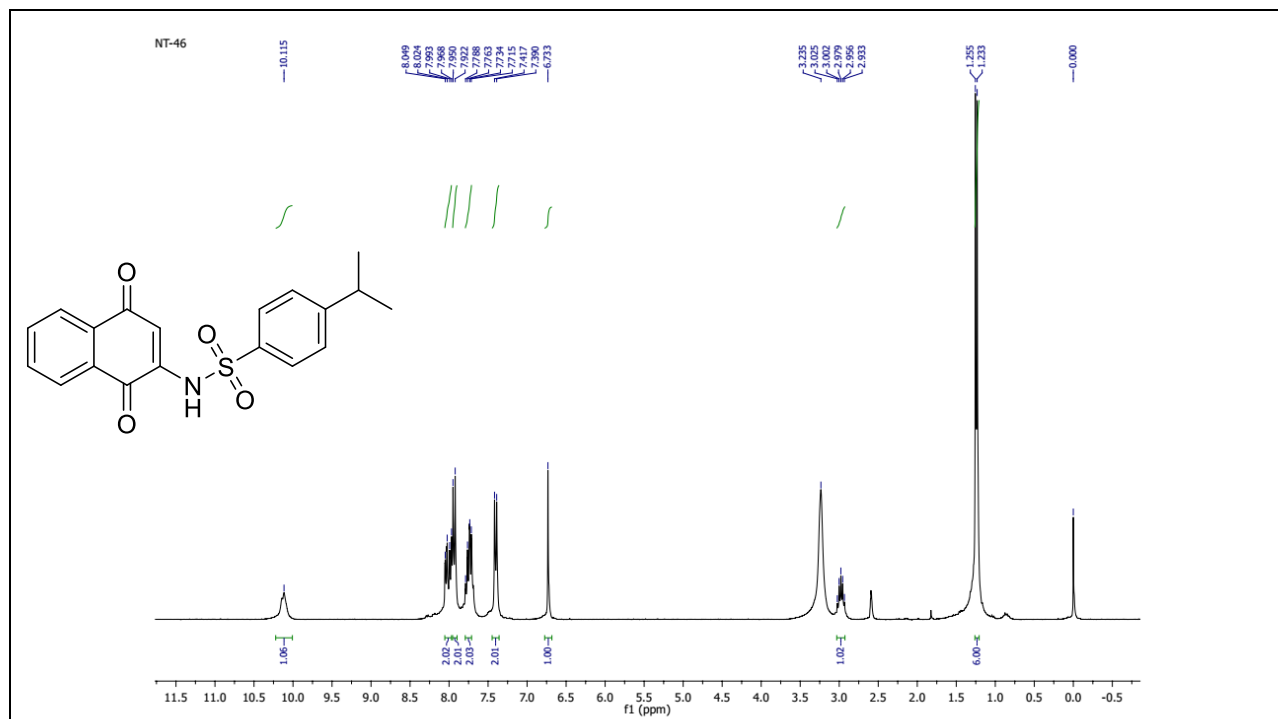

**Fig. 7.** <sup>1</sup>H-NMR spectrum of *N*-(1,4-dioxo-1,4-dihydronaphthalen-2-yl)-4-isopropylbenzenesulfonamide (Table 2, **3d**).

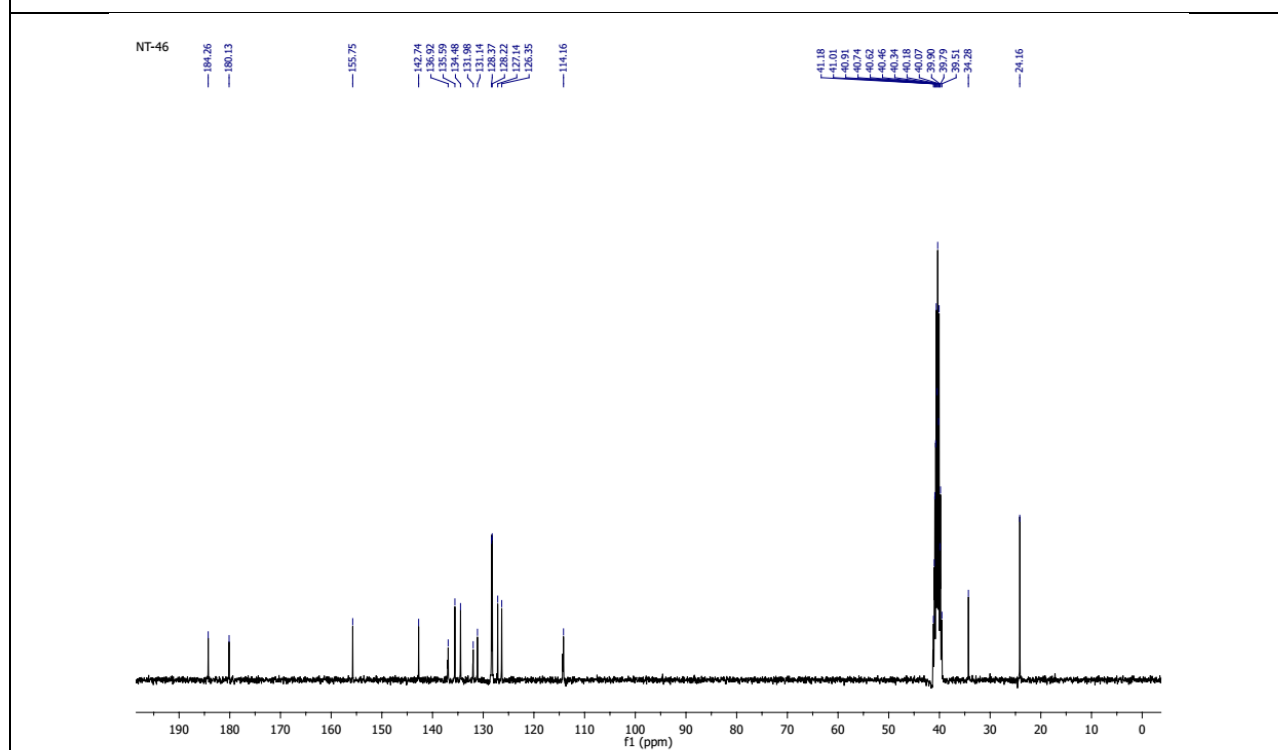

**Fig. 8.** <sup>13</sup>C-NMR spectrum of *N*-(1,4-dioxo-1,4-dihydronaphthalen-2-yl)-4-isopropylbenzenesulfonamide (Table 2, **3d**).

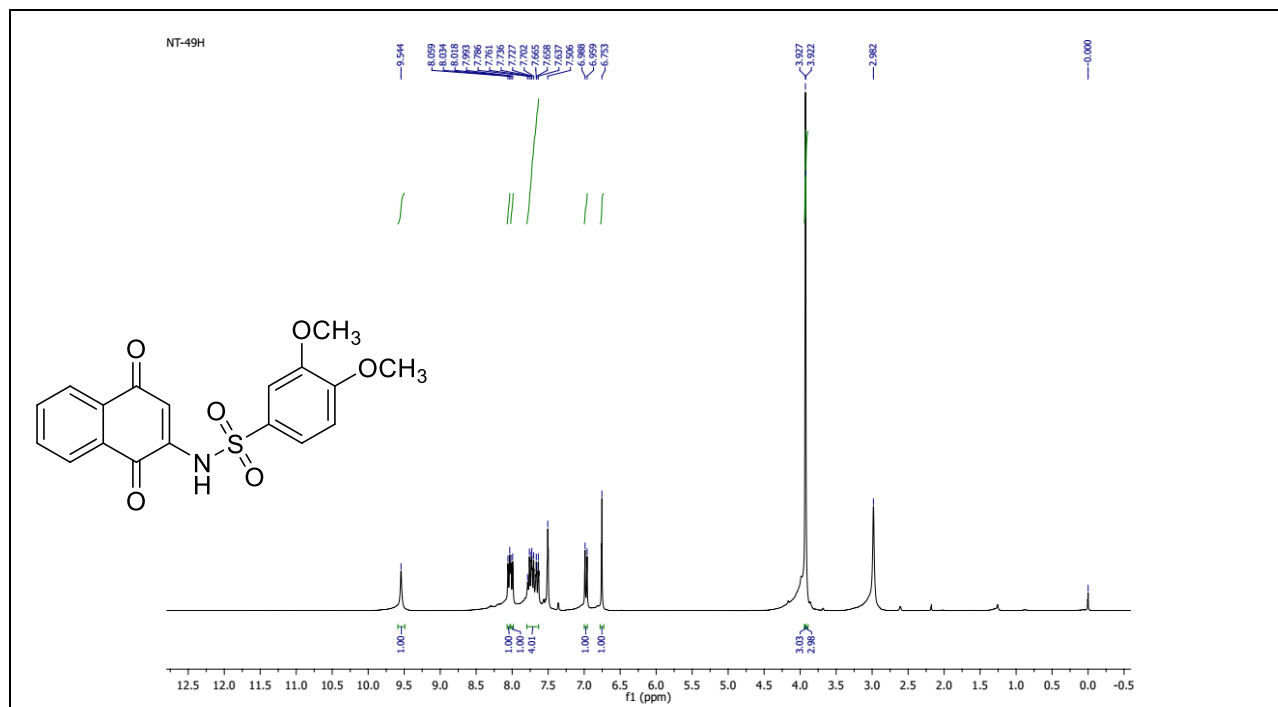

**Fig. 9.** <sup>1</sup>H-NMR spectrum of *N*-(1,4-dioxo-1,4-dihydronaphthalen-2-yl)-3,4-dimethoxybenzenesulfonamide (Table 2, **3e**).

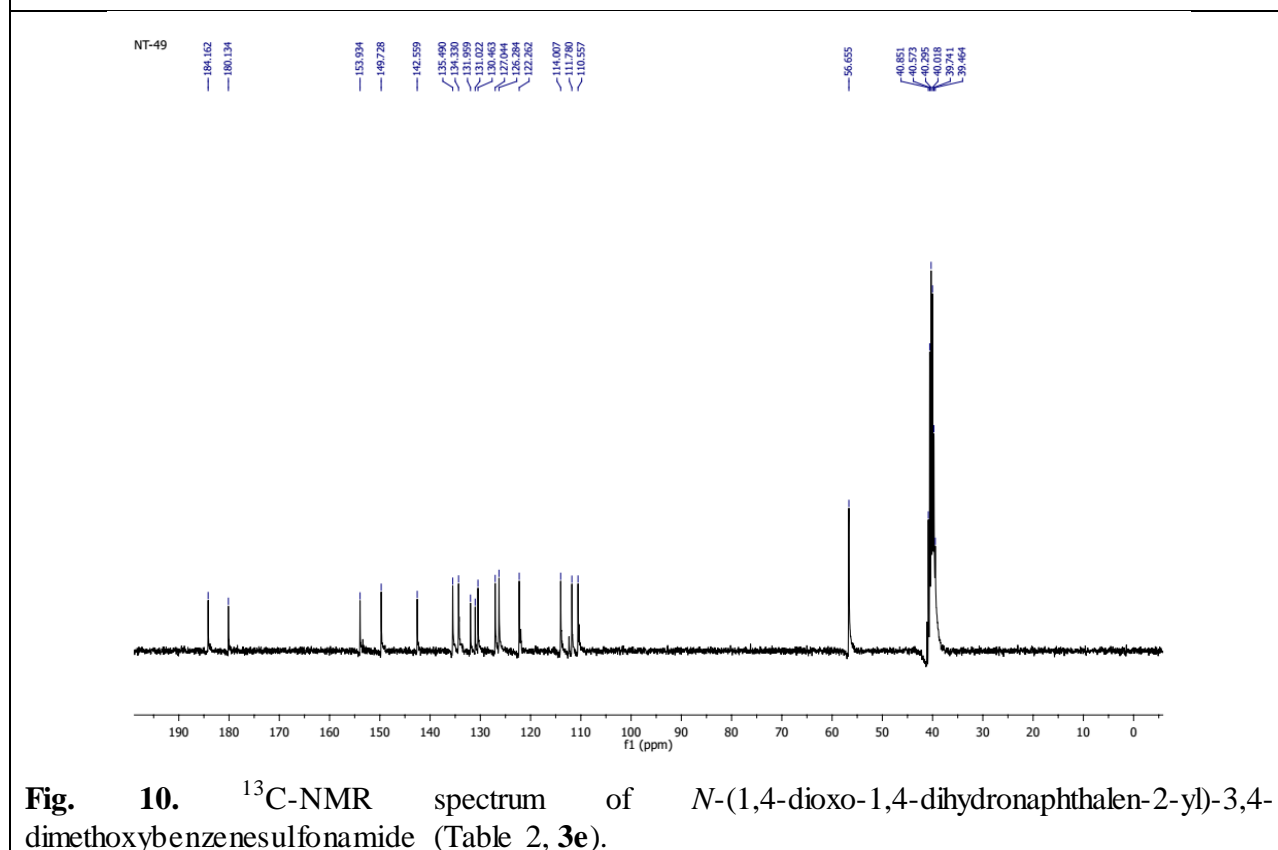

**Fig. 10.** <sup>13</sup>C-NMR spectrum of *N*-(1,4-dioxo-1,4-dihydronaphthalen-2-yl)-3,4-dimethoxybenzenesulfonamide (Table 2, **3e**).



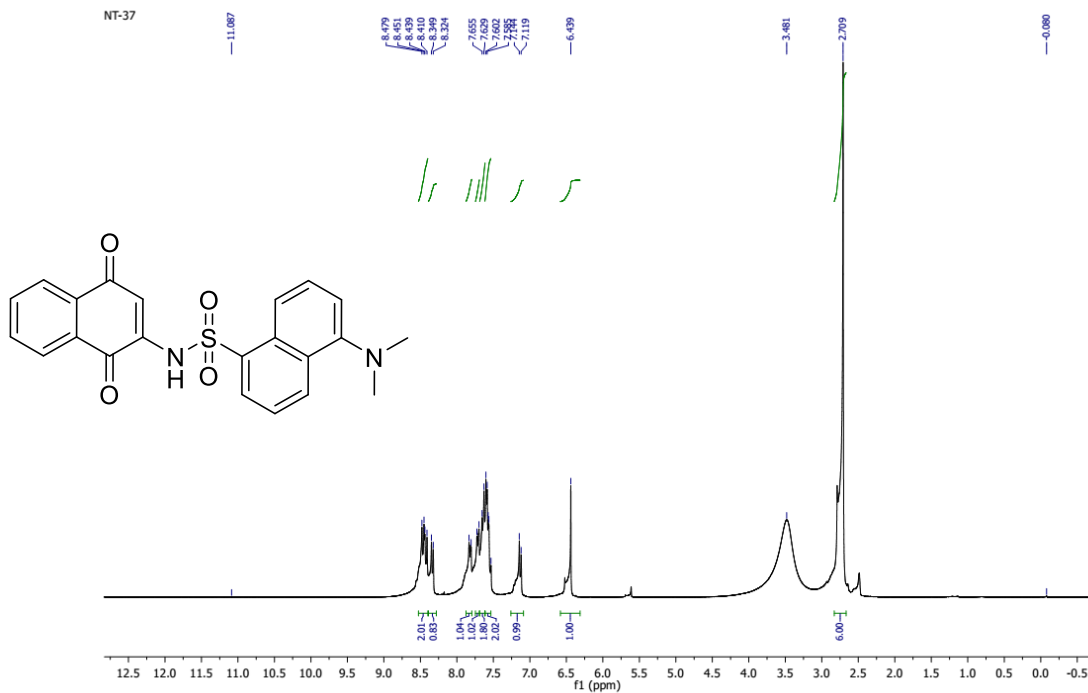

**Fig. 11.**  $^1\text{H-NMR}$  spectrum of 5-(Dimethylamino)-*N*-(1,4-dioxo-1,4-dihydronaphthalen-2-yl)naphthalene-1-sulfonamide (Table 2, **3g**).

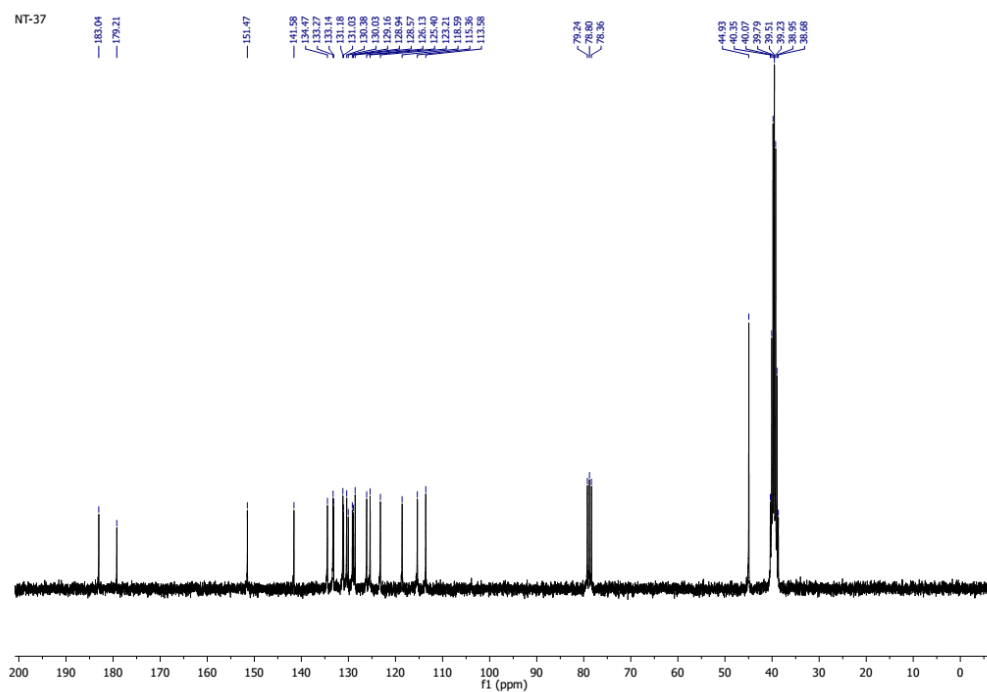

**Fig. 12.**  $^{13}\text{C-NMR}$  spectrum of 5-(dimethylamino)-*N*-(1,4-dioxo-1,4-dihydronaphthalen-2-yl)naphthalene-1-sulfonamide (Table 2, **3g**).

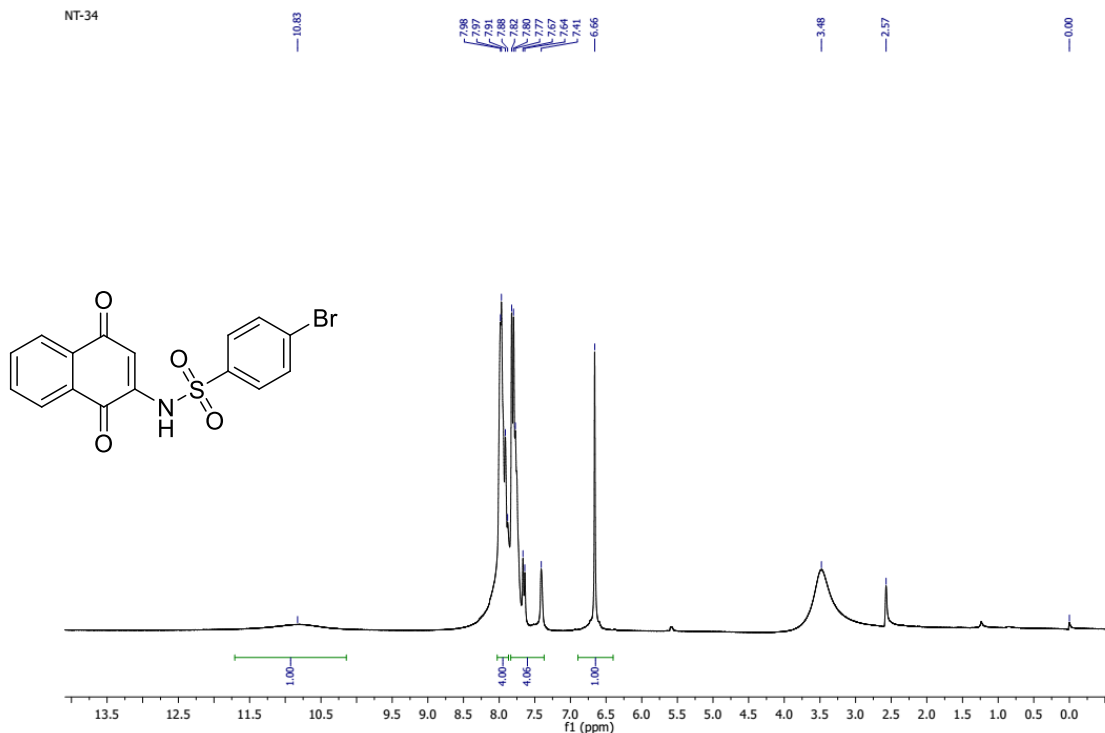

**Fig. 13.**  $^1\text{H-NMR}$  spectrum of *N*-(1,4-dioxo-1,4-dihydronaphthalen-2-yl)-4-bromobenzenesulfonamide (Table 2, **3h**).

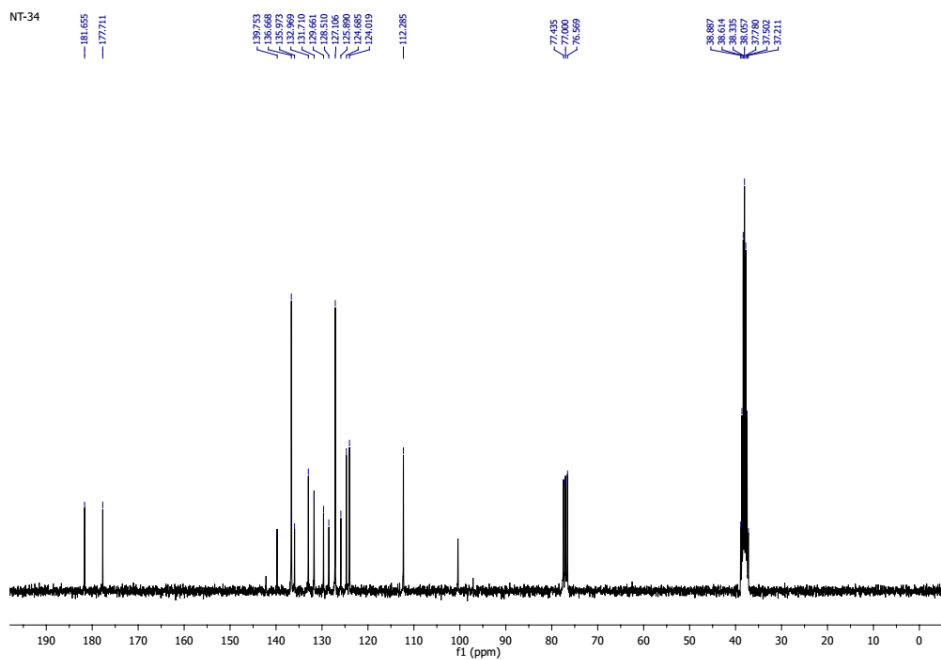

**Fig. 14.**  $^{13}\text{C-NMR}$  spectrum of *N*-(1,4-dioxo-1,4-dihydronaphthalen-2-yl)-4-bromobenzenesulfonamide (Table 2, **3h**).

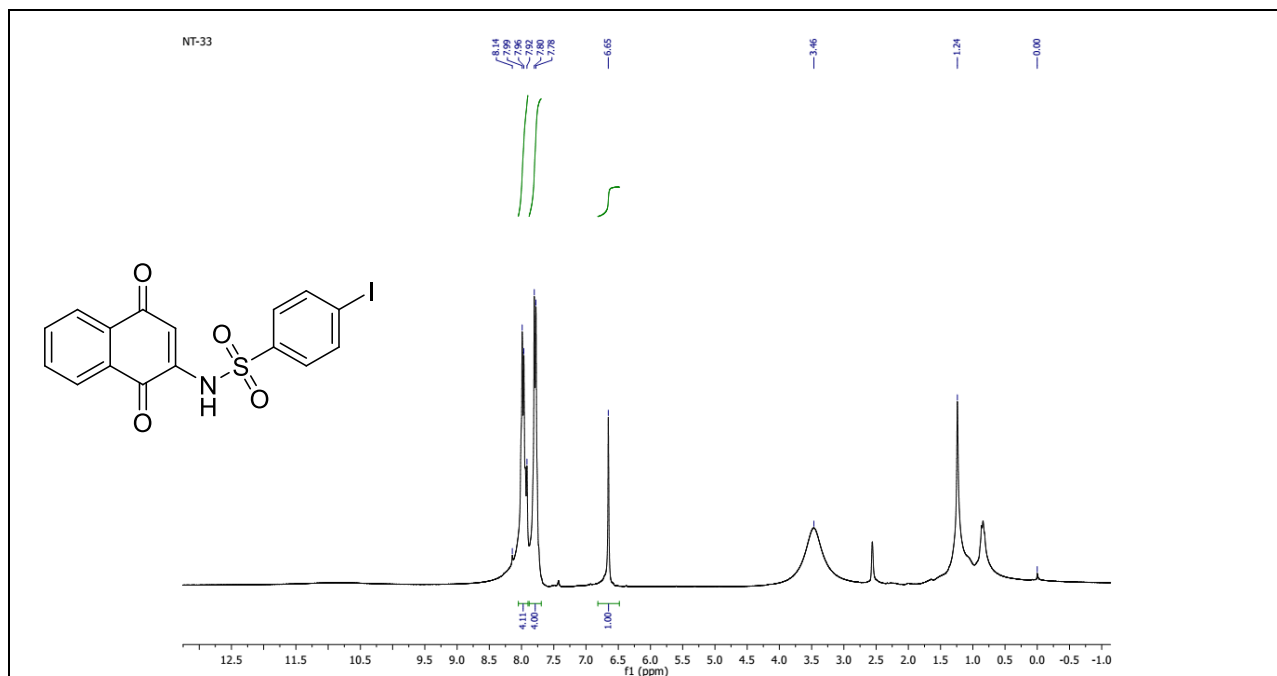

**Fig. 15.** <sup>1</sup>H-NMR spectrum of *N*-(1,4-dioxo-1,4-dihydronaphthalen-2-yl)-4-iodobenzenesulfonamide (Table 2, **3i**).

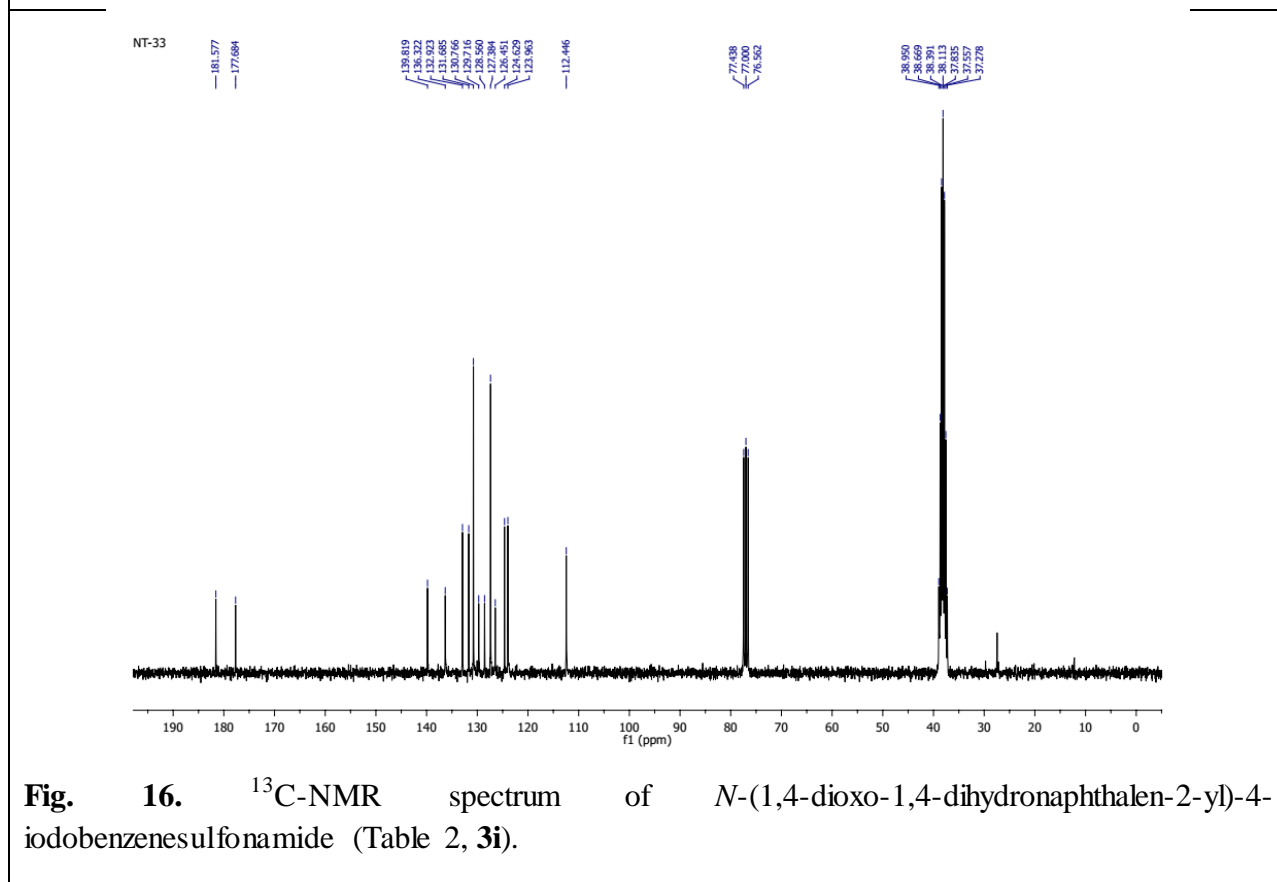

**Fig. 16.** <sup>13</sup>C-NMR spectrum of *N*-(1,4-dioxo-1,4-dihydronaphthalen-2-yl)-4-iodobenzenesulfonamide (Table 2, **3i**).

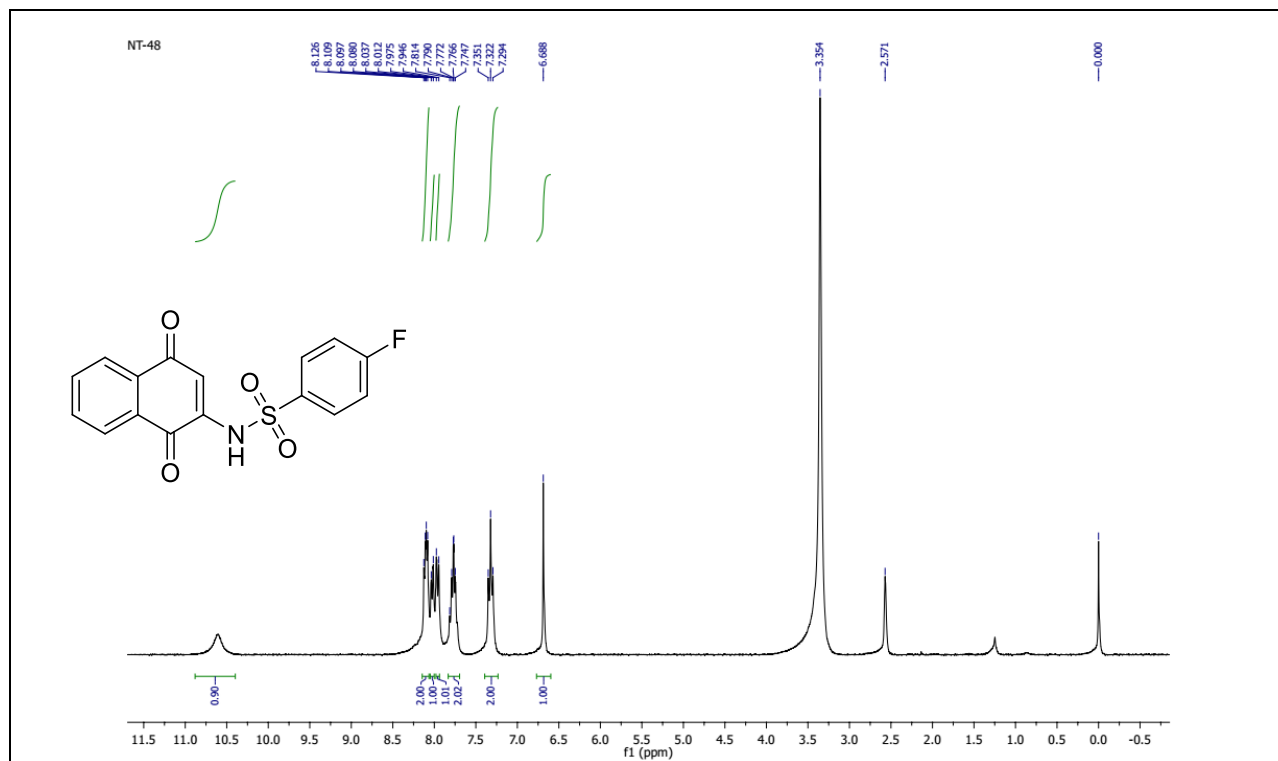

**Fig. 17.** <sup>1</sup>H-NMR spectrum of *N*-(1,4-dioxo-1,4-dihydronaphthalen-2-yl)-4-fluorobenzenesulfonamide (Table 2, **3j**).

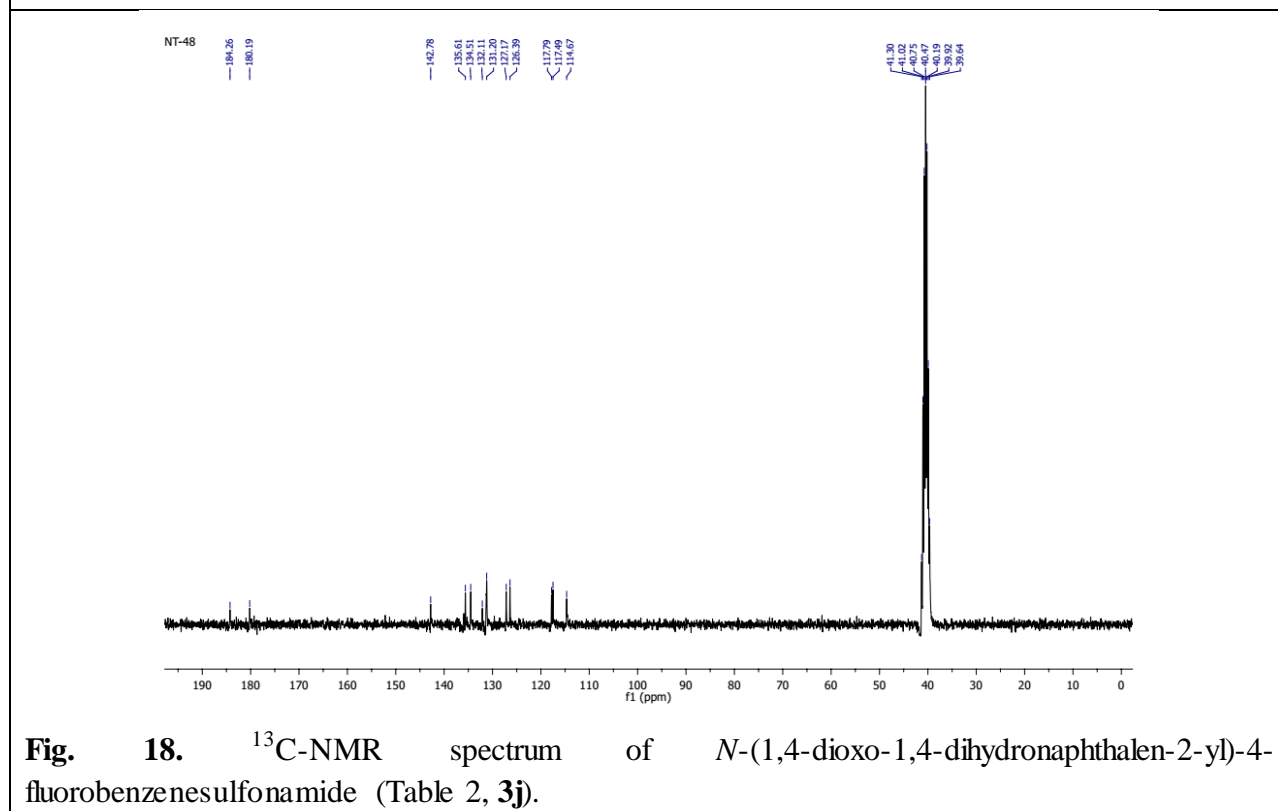

**Fig. 18.** <sup>13</sup>C-NMR spectrum of *N*-(1,4-dioxo-1,4-dihydronaphthalen-2-yl)-4-fluorobenzenesulfonamide (Table 2, **3j**).

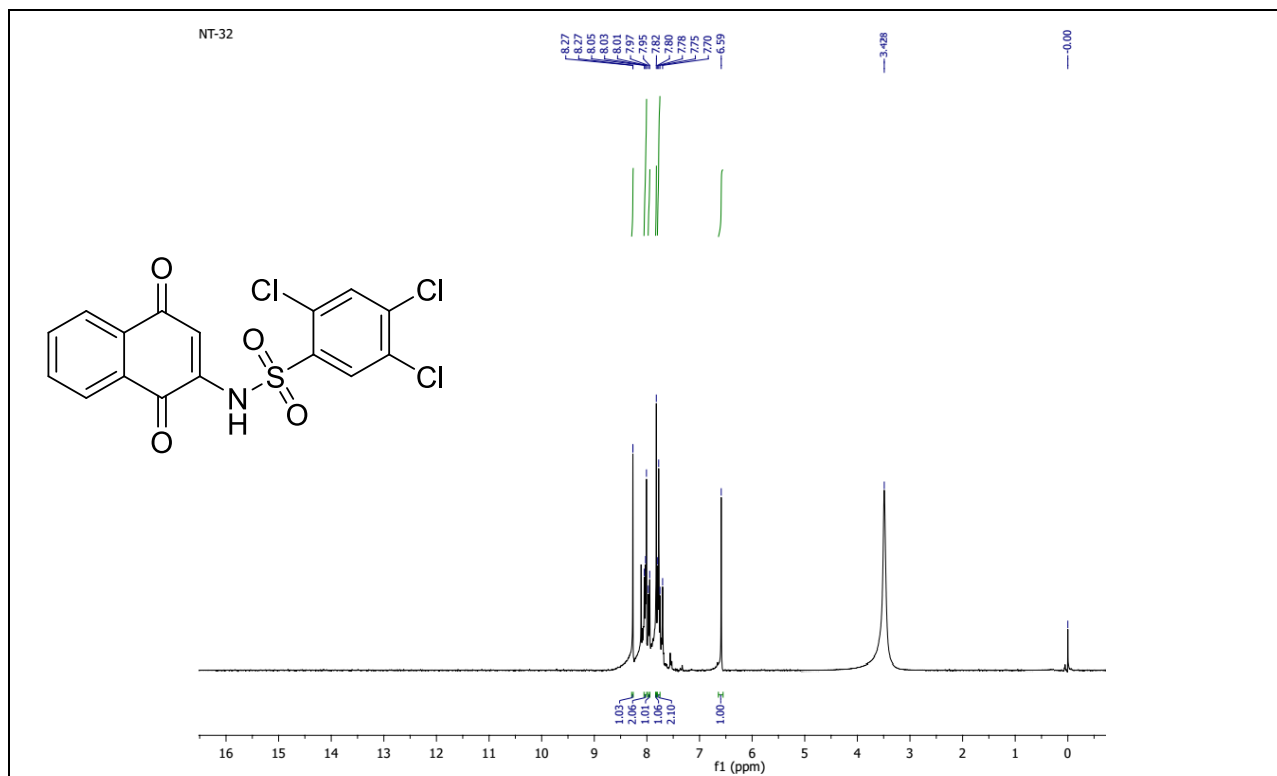

**Fig. 19.**  $^1\text{H-NMR}$  spectrum of 2,4,5-trichloro-*N*-(1,4-dioxo-1,4-dihydronaphthalen-2-yl)benzenesulfonamide (Table 2, **3k**).

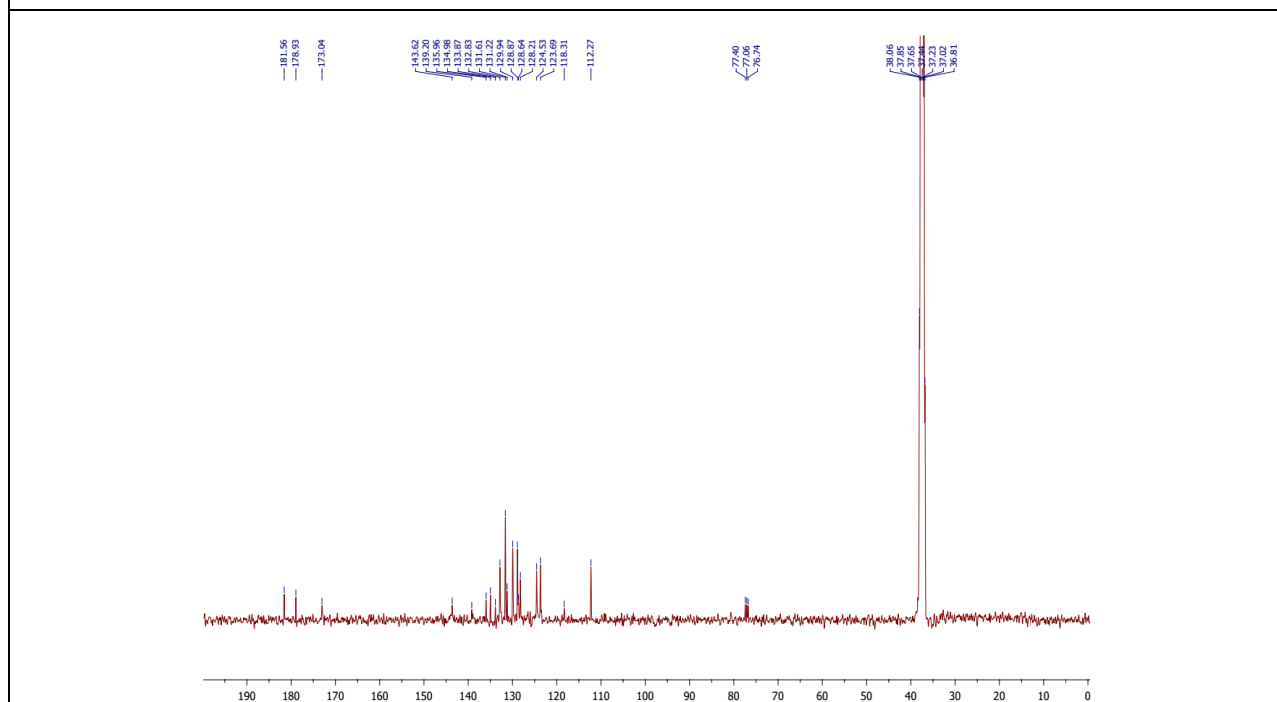

**Fig. 20.**  $^{13}\text{C-NMR}$  spectrum of 2,4,5-trichloro-*N*-(1,4-dioxo-1,4-dihydronaphthalen-2-yl)benzenesulfonamide (Table 2, **3k**).

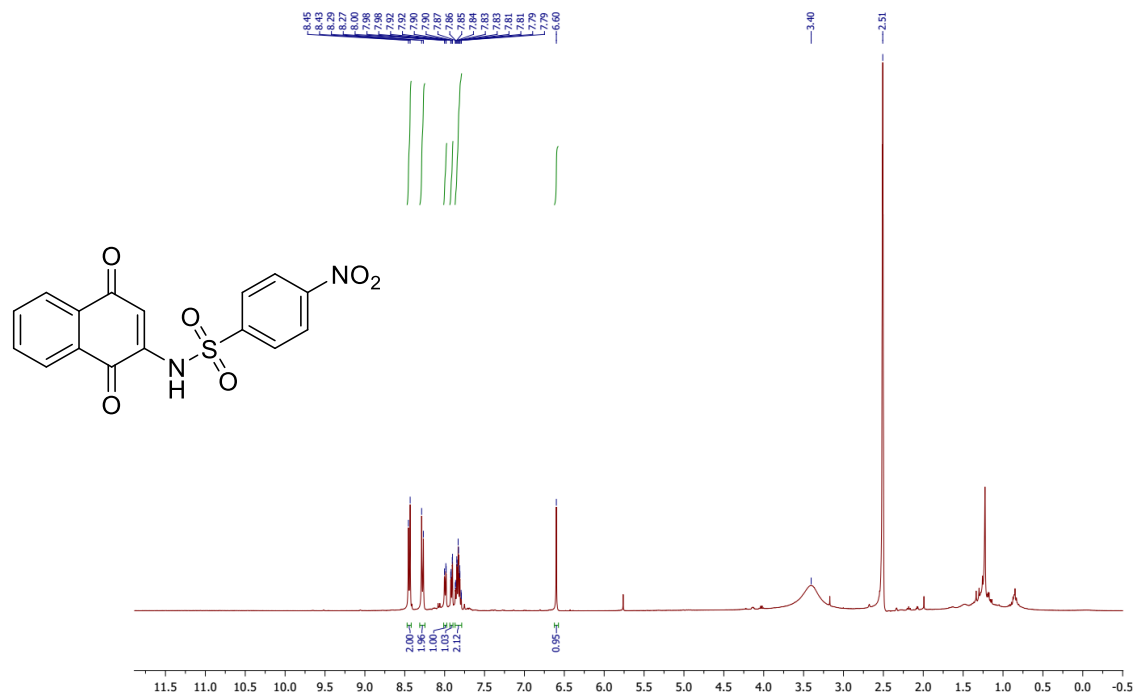

**Fig. 21.** <sup>1</sup>H-NMR spectrum of *N*-(1,4-dioxo-1,4-dihydronaphthalen-2-yl)-4-nitrobenzenesulfonamide (Table 2, **3I**).

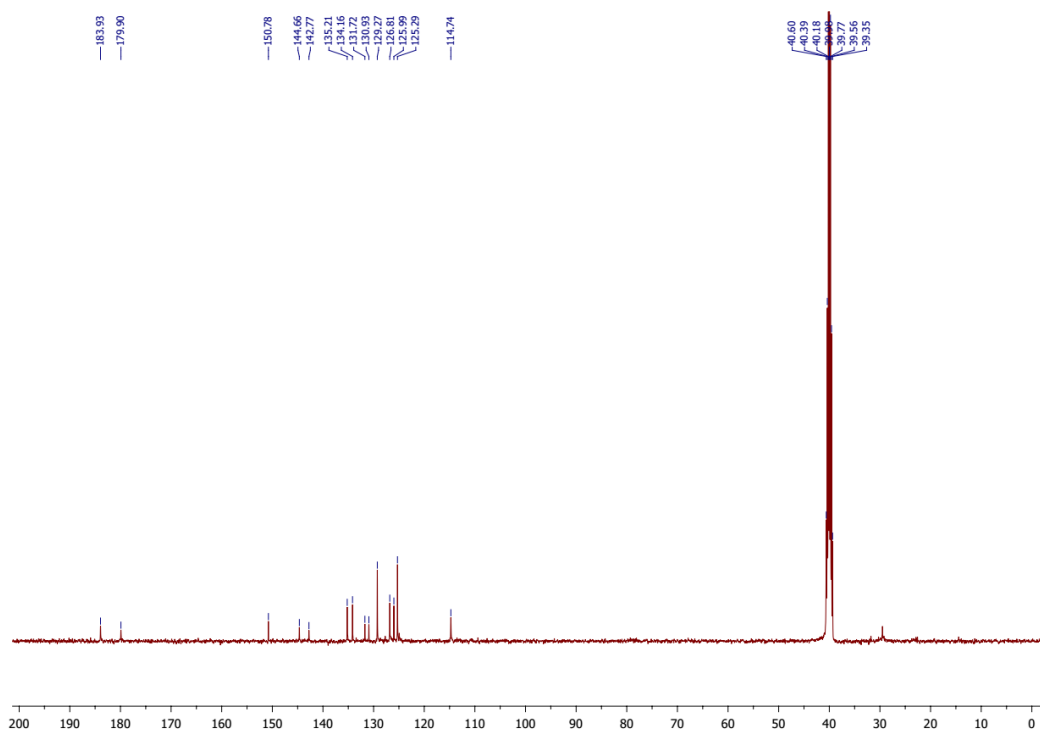

**Fig. 22.** <sup>13</sup>C-NMR spectrum of *N*-(1,4-dioxo-1,4-dihydronaphthalen-2-yl)-4-nitrobenzenesulfonamide (Table 2, **3I**).

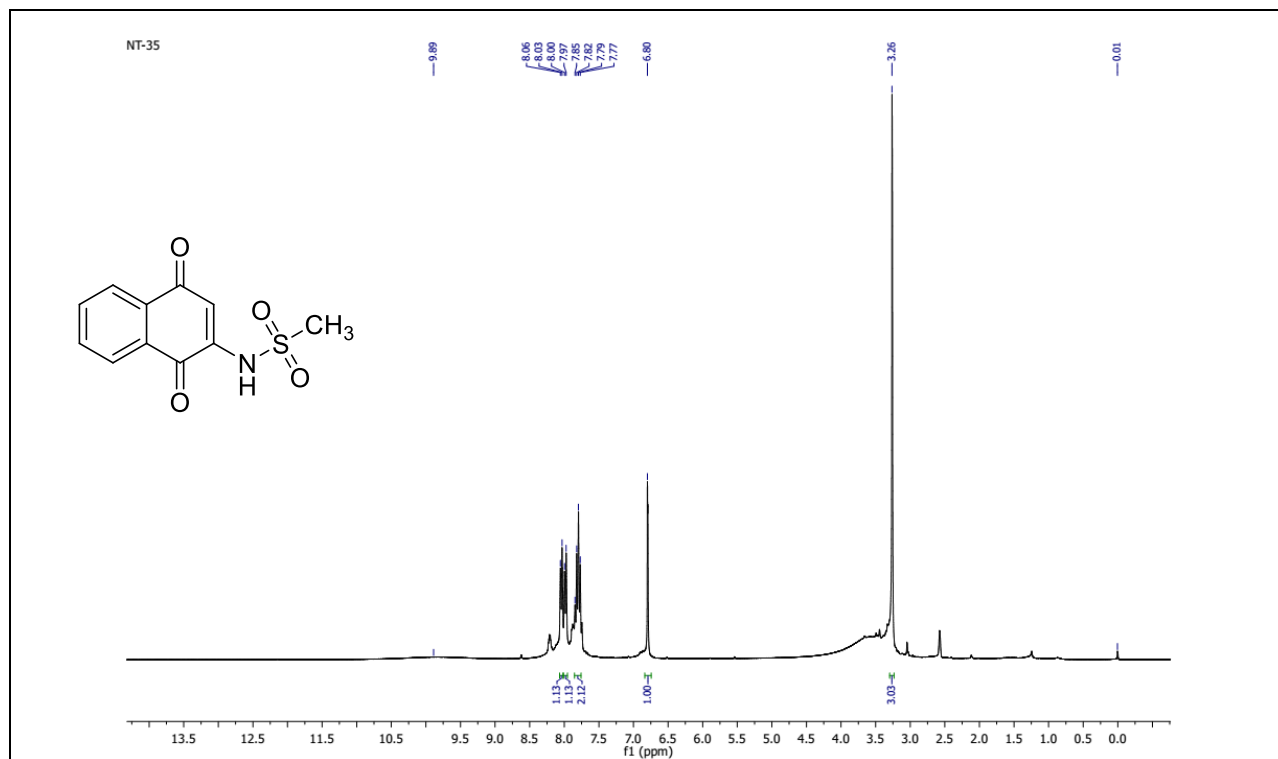

**Fig. 23.**  $^1\text{H}$ -NMR spectrum of *N*-(1,4-dioxo-1,4-dihydronaphthalen-2-yl)methanesulfonamide (Table 2, **3m**).

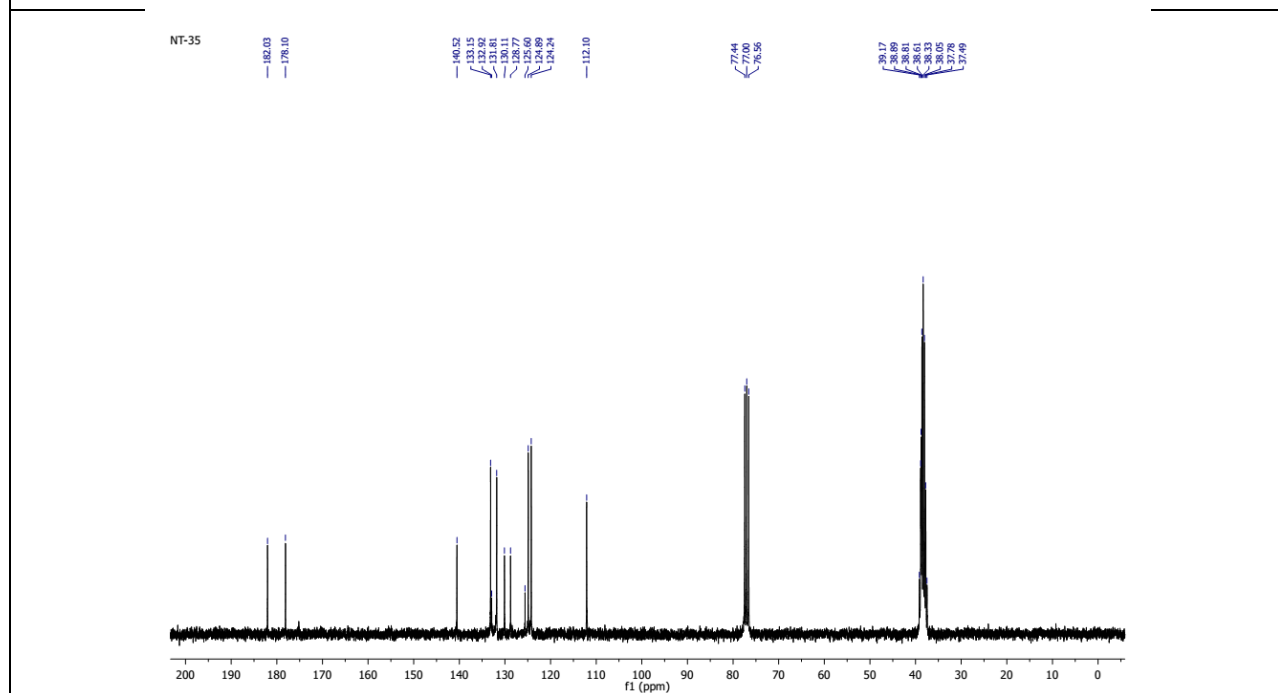

**Fig. 24.**  $^{13}\text{C}$ -NMR spectrum of *N*-(1,4-dioxo-1,4-dihydronaphthalen-2-yl)methanesulfonamide (Table 2, **3m**).

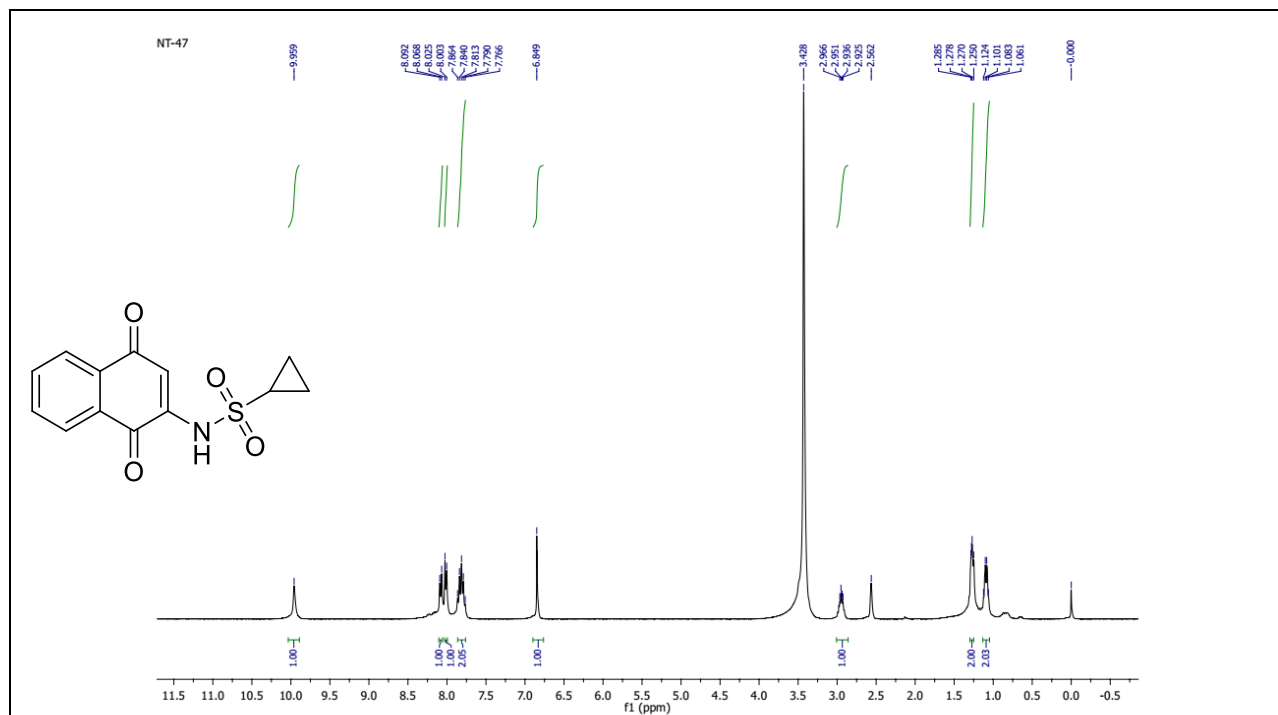

**Fig. 25.** <sup>1</sup>H-NMR spectrum of *N*-(1,4-dioxo-1,4-dihydronaphthalen-2-yl)cyclopropanesulfonamide (Table 2, **3n**).

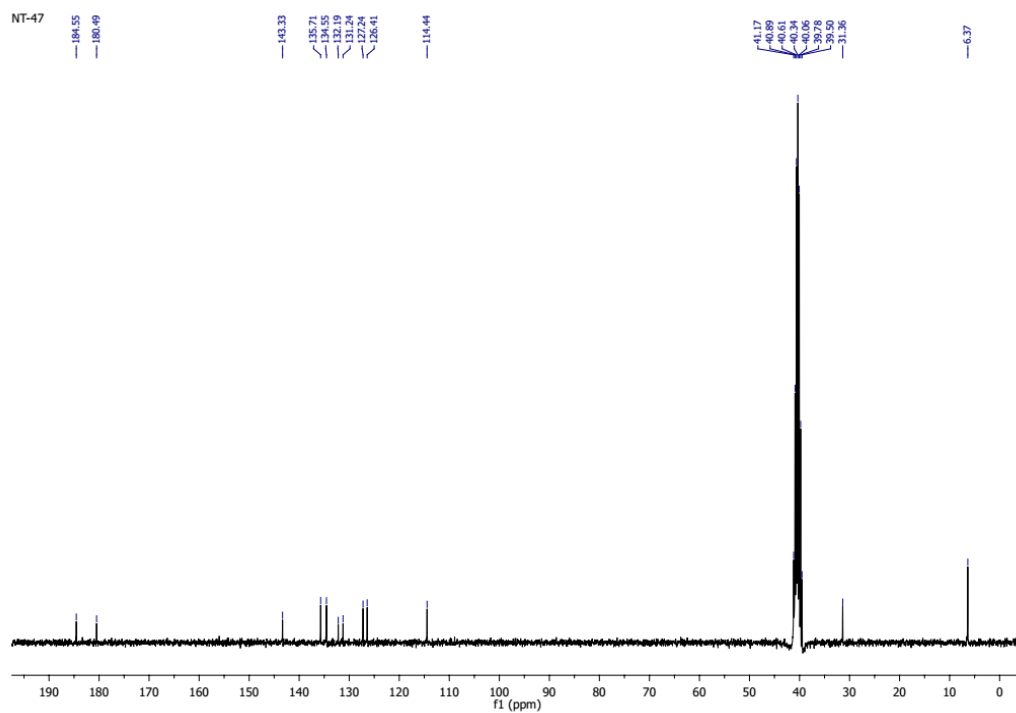

**Fig. 26.** <sup>13</sup>C-NMR spectrum of *N*-(1,4-dioxo-1,4-dihydronaphthalen-2-yl)cyclopropanesulfonamide (Table 2, **3n**).



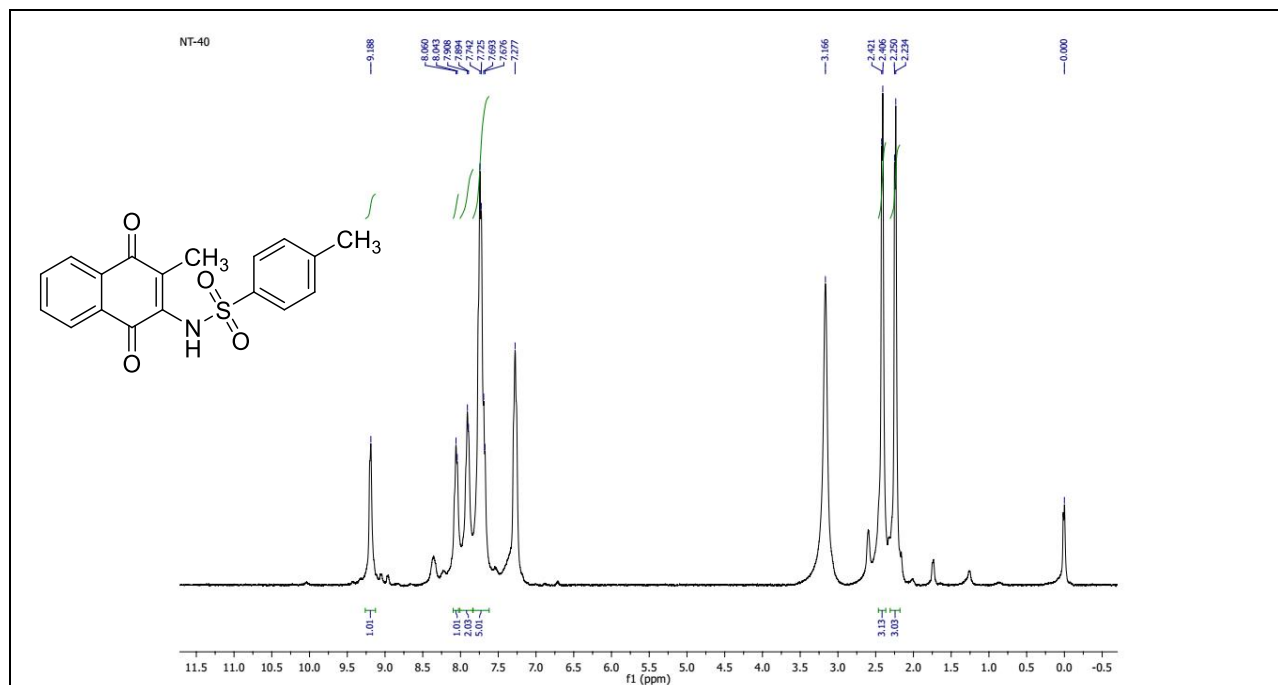

**Fig. 27.** <sup>1</sup>H-NMR spectrum of 4-Methyl-*N*-(3-methyl-1,4-dioxo-1,4-dihydronaphthalen-2-yl)benzenesulfonamide (Table 3, **5a**).

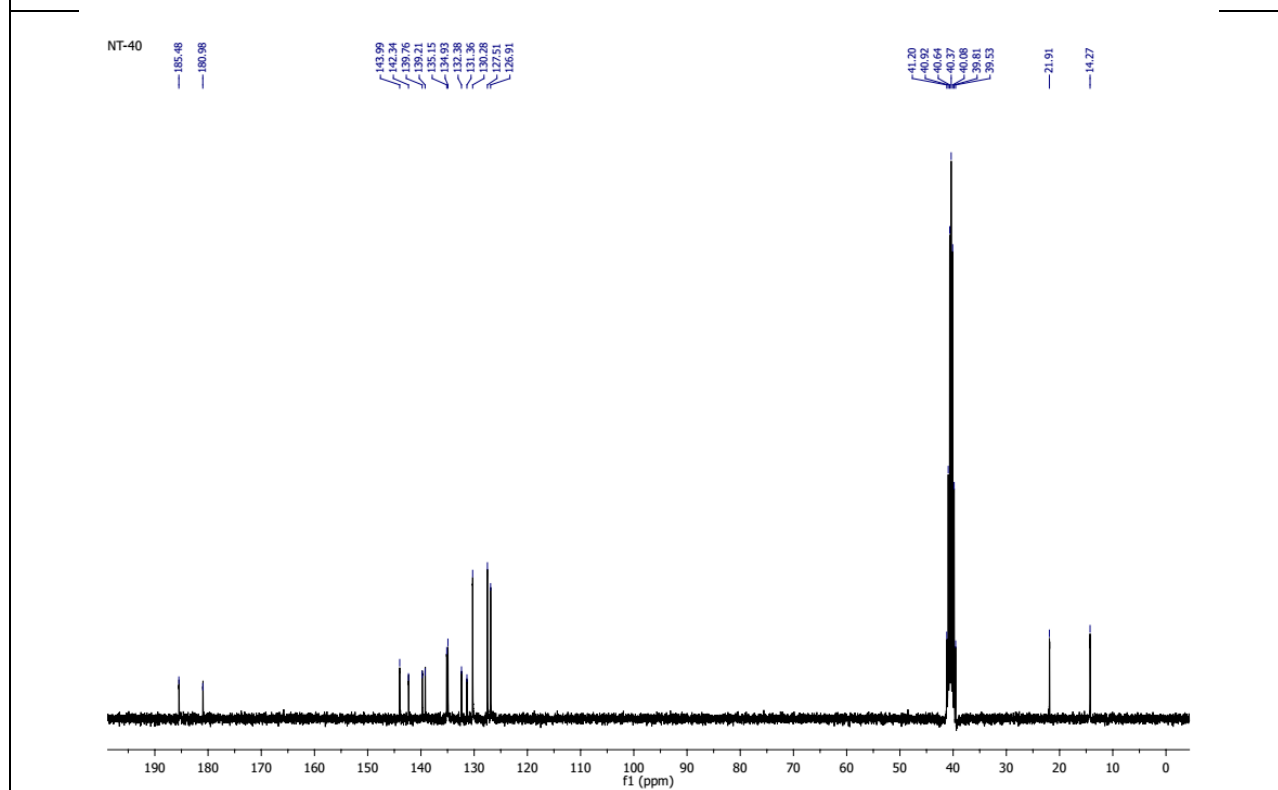

**Fig. 28.** <sup>13</sup>C-NMR spectrum of 4-Methyl-*N*-(3-methyl-1,4-dioxo-1,4-dihydronaphthalen-2-yl)benzenesulfonamide (Table 3, **5a**).

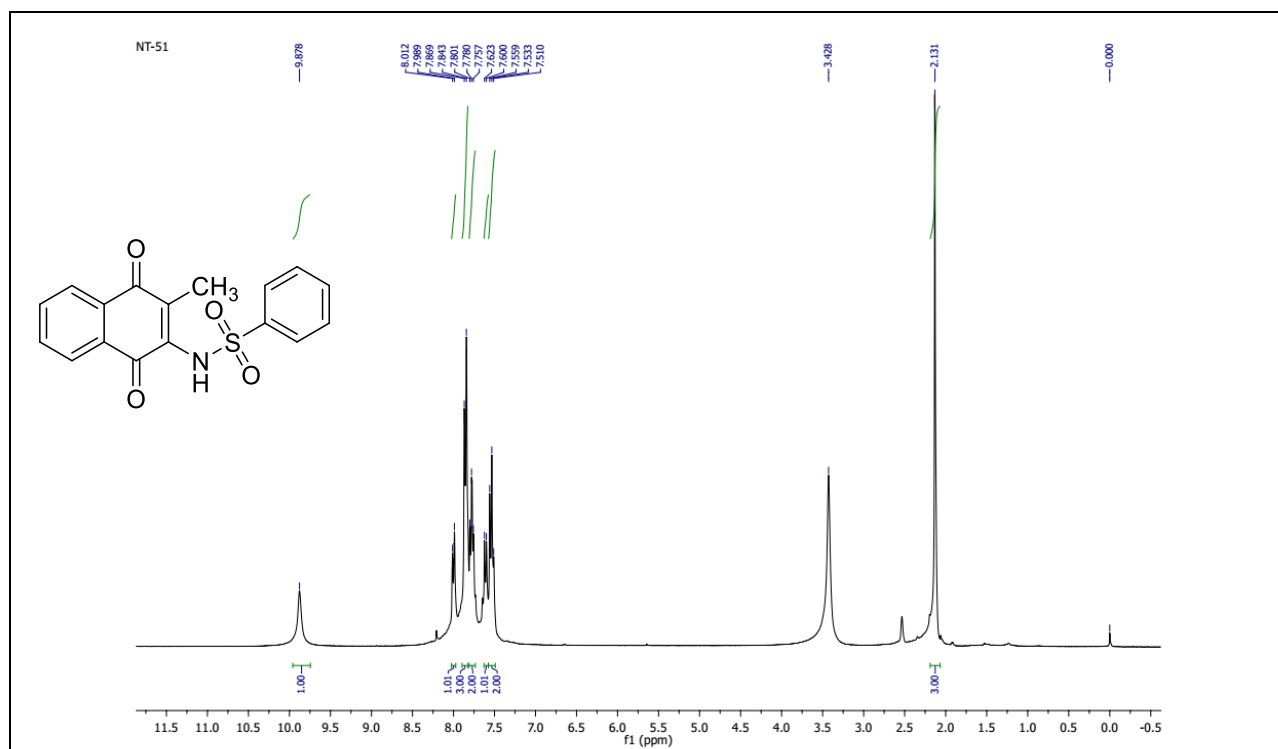

**Fig. 29.** <sup>1</sup>H-NMR spectrum of *N*-(3-methyl-1,4-dioxo-1,4-dihydronaphthalen-2-yl)benzenesulfonamide (Table 3, **5b**).

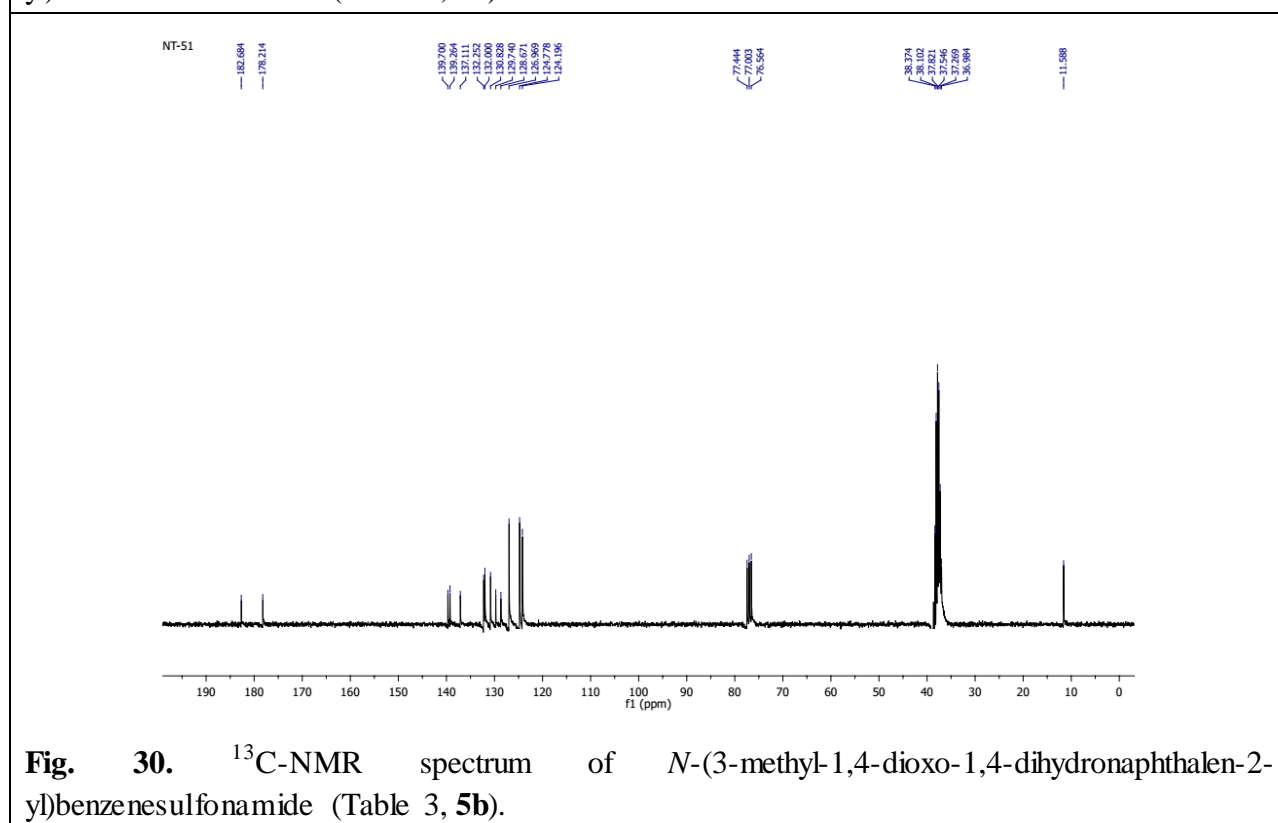

**Fig. 30.** <sup>13</sup>C-NMR spectrum of *N*-(3-methyl-1,4-dioxo-1,4-dihydronaphthalen-2-yl)benzenesulfonamide (Table 3, **5b**).

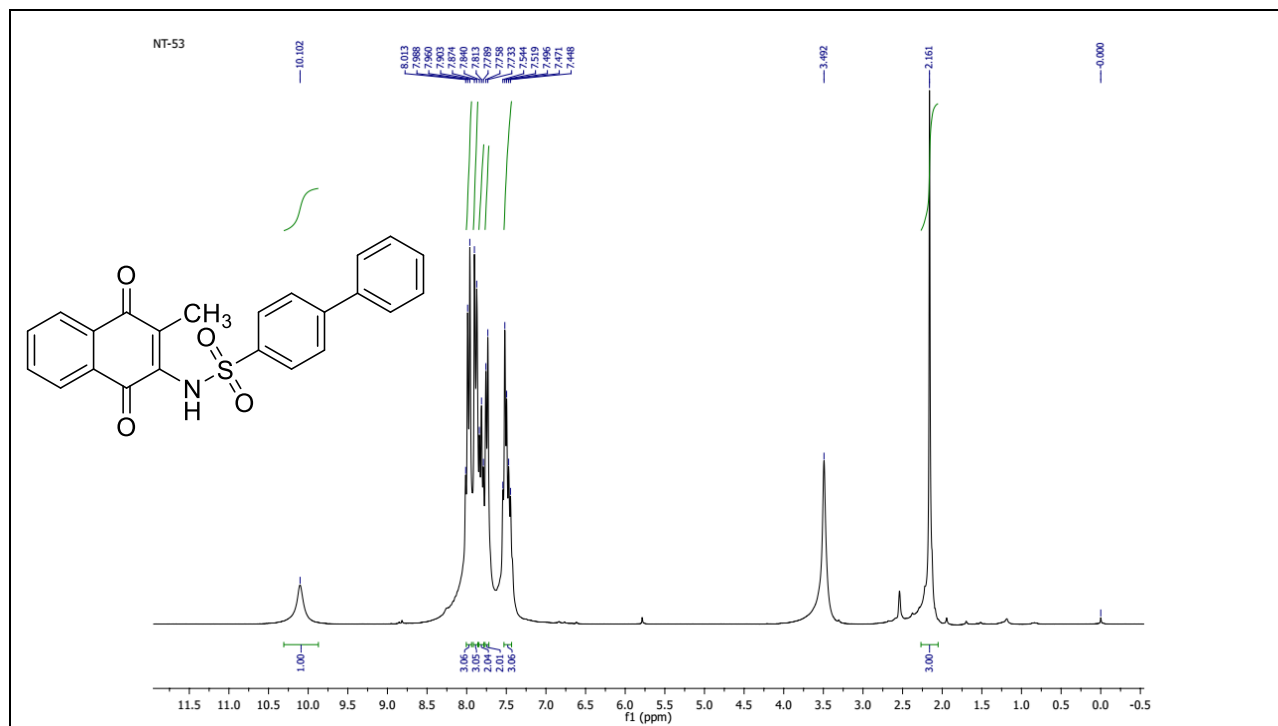

**Fig. 31.** <sup>1</sup>H-NMR spectrum of *N*-(3-methyl-1,4-dioxo-1,4-dihydronaphthalen-2-yl)biphenyl-4-sulfonamide (Table 3, **5c**).

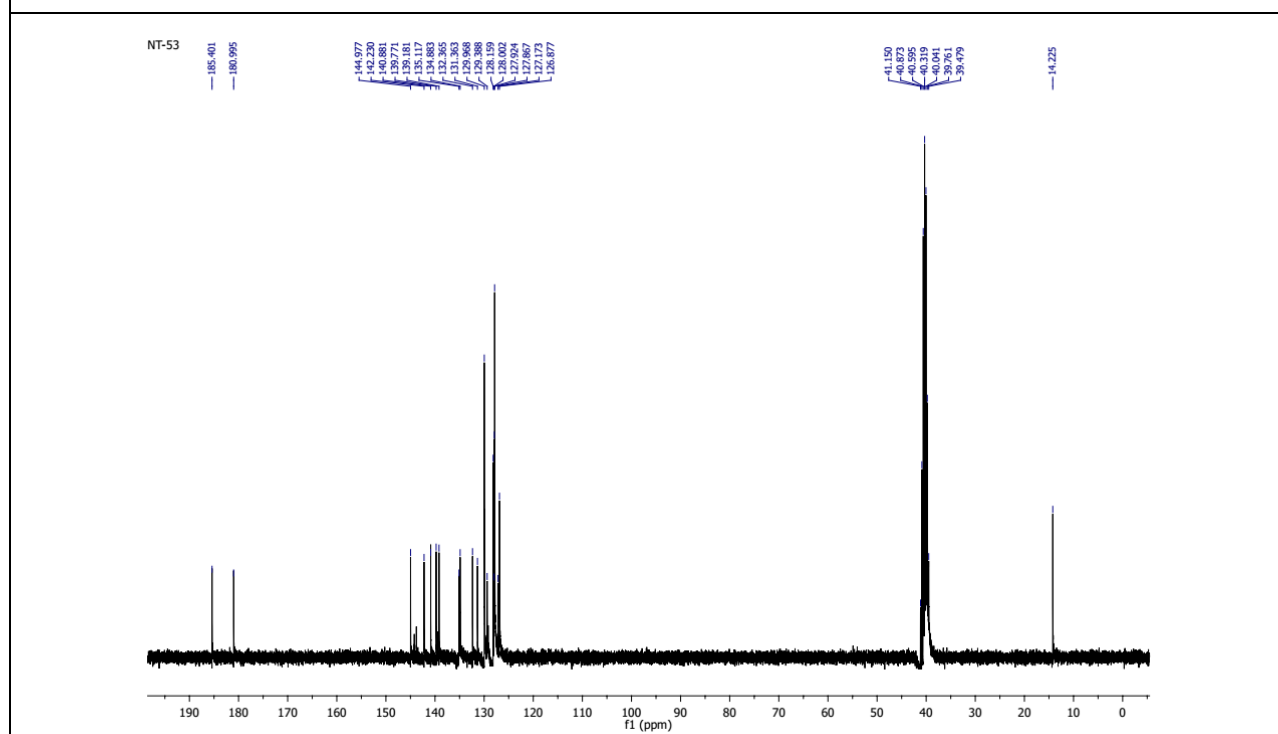

**Fig. 32.** <sup>13</sup>C-NMR spectrum of *N*-(3-methyl-1,4-dioxo-1,4-dihydronaphthalen-2-yl)biphenyl-4-sulfonamide (Table 3, **5c**).

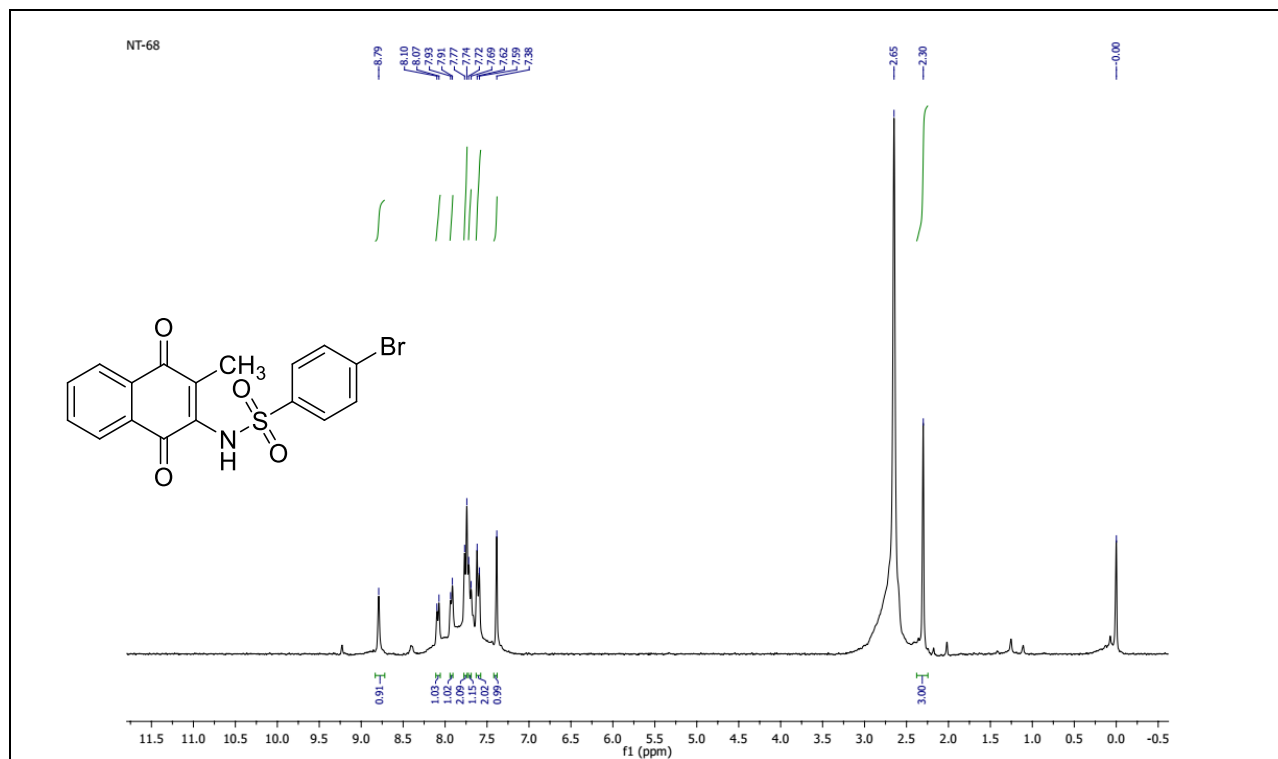

**Fig. 33.**  $^1\text{H-NMR}$  spectrum of 4-Bromo-*N*-(3-methyl-1,4-dioxo-1,4-dihydronaphthalen-2-yl)benzenesulfonamide (Table 3, **5d**).

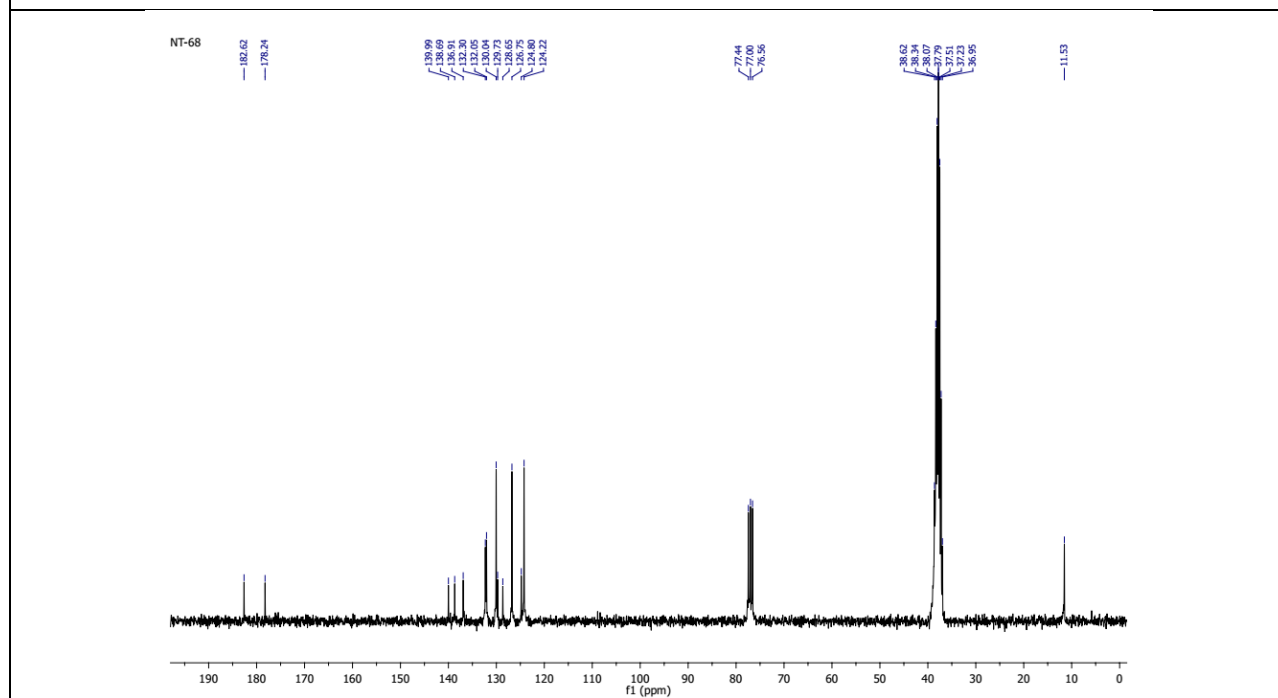

**Fig. 34.**  $^{13}\text{C-NMR}$  spectrum of 4-Bromo-*N*-(3-methyl-1,4-dioxo-1,4-dihydronaphthalen-2-yl)benzenesulfonamide (Table 3, **5d**).

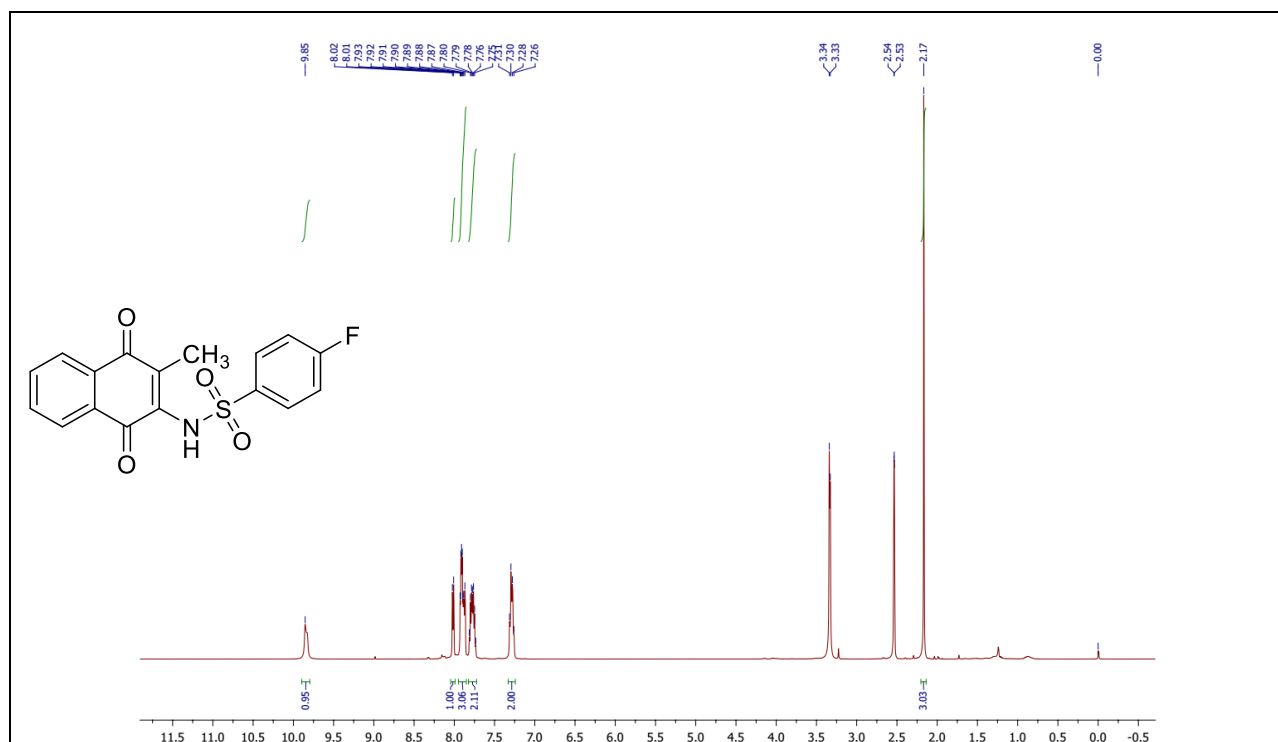

**Fig. 35.** <sup>1</sup>H-NMR spectrum of 4-Fluoro-*N*-(3-methyl-1,4-dioxo-1,4-dihydronaphthalen-2-yl)benzenesulfonamide (Table 3, **5e**).

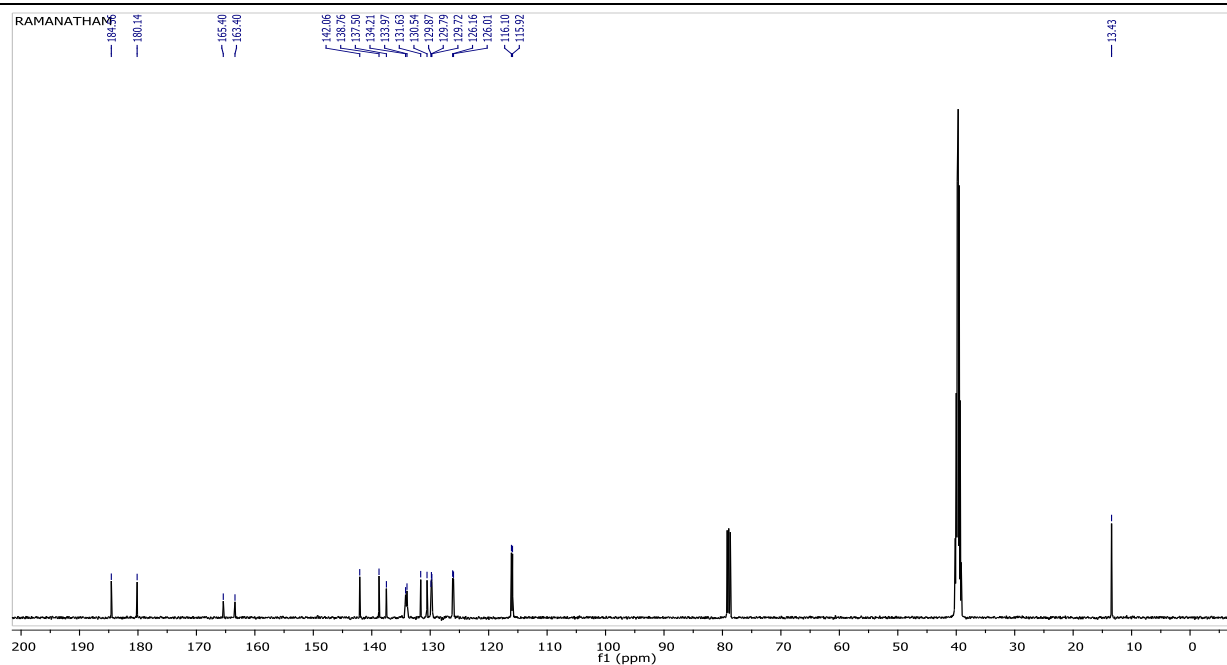

**Fig. 36.** <sup>13</sup>C-NMR spectrum of 4-Fluoro-*N*-(3-methyl-1,4-dioxo-1,4-dihydronaphthalen-2-yl)benzenesulfonamide (Table 3, **5e**).

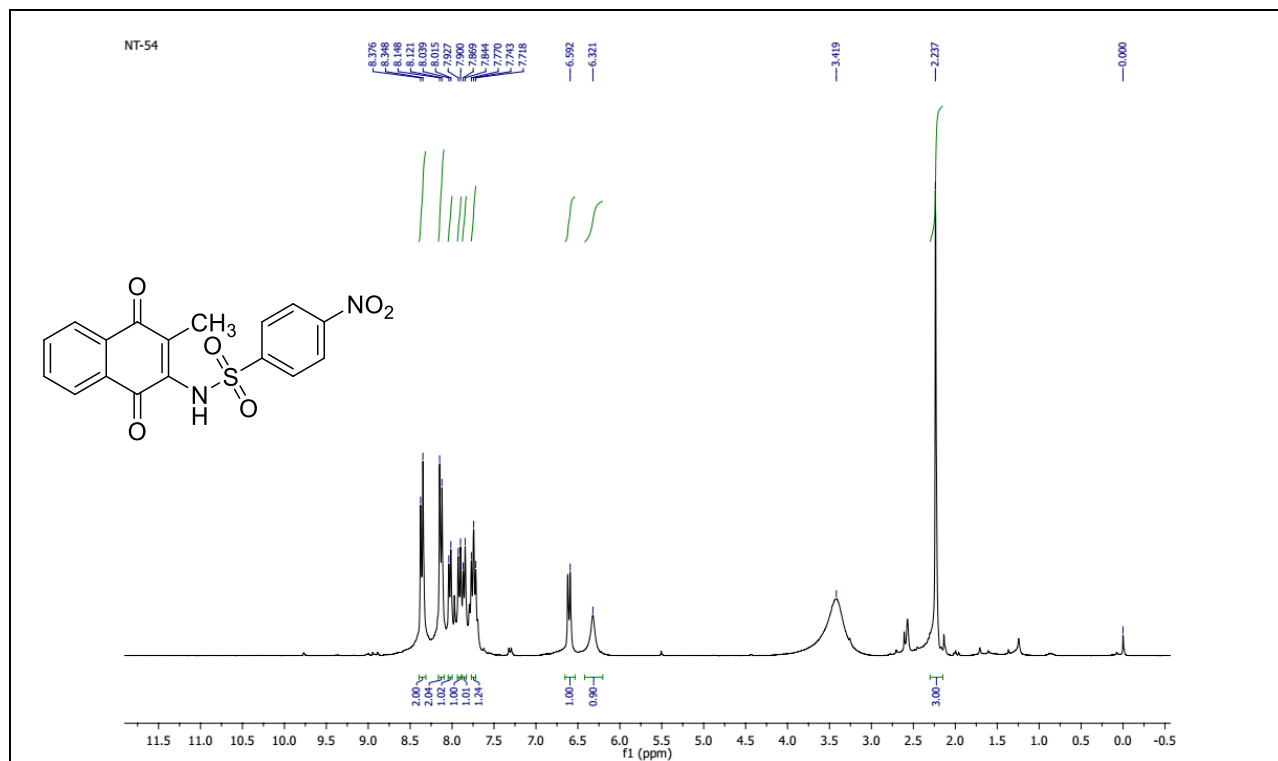

**Fig. 37.**  $^1\text{H-NMR}$  spectrum of *N*-(3-methyl-1,4-dioxo-1,4-dihydronaphthalen-2-yl)-4-nitrobenzenesulfonamide (Table 3, **5f**).

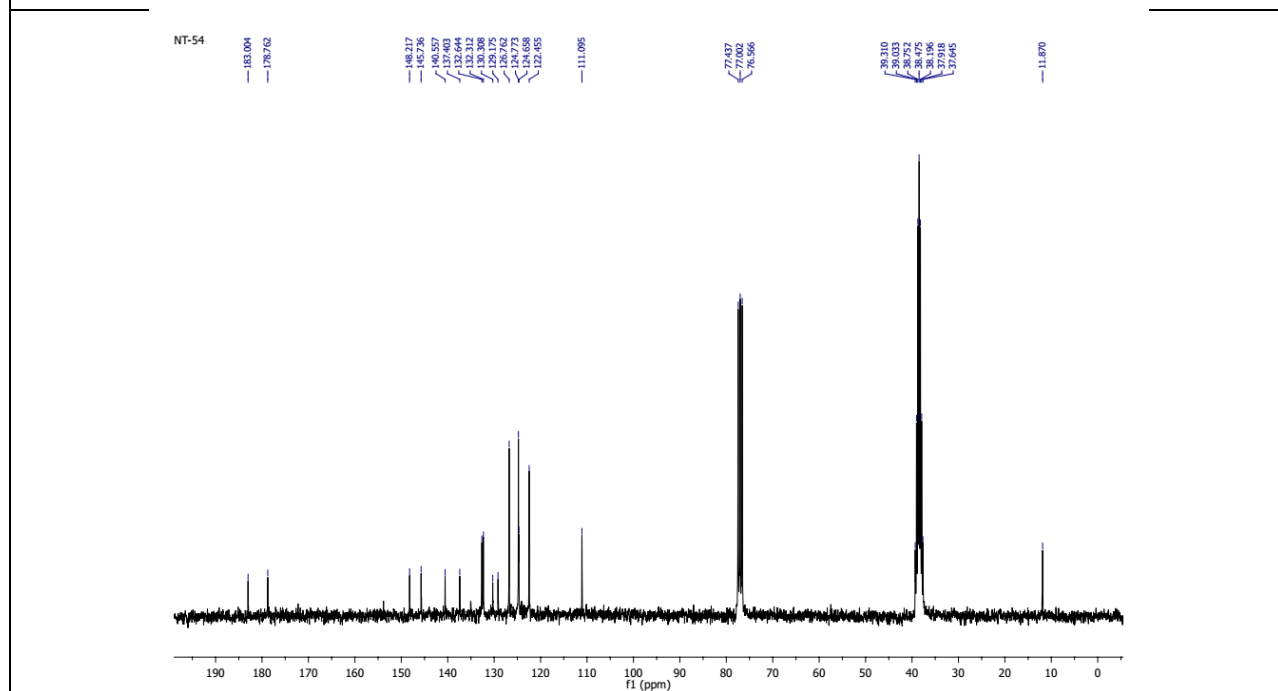

**Fig. 38.**  $^{13}\text{C-NMR}$  spectrum of *N*-(3-methyl-1,4-dioxo-1,4-dihydronaphthalen-2-yl)-4-nitrobenzenesulfonamide (Table 3, **5f**).

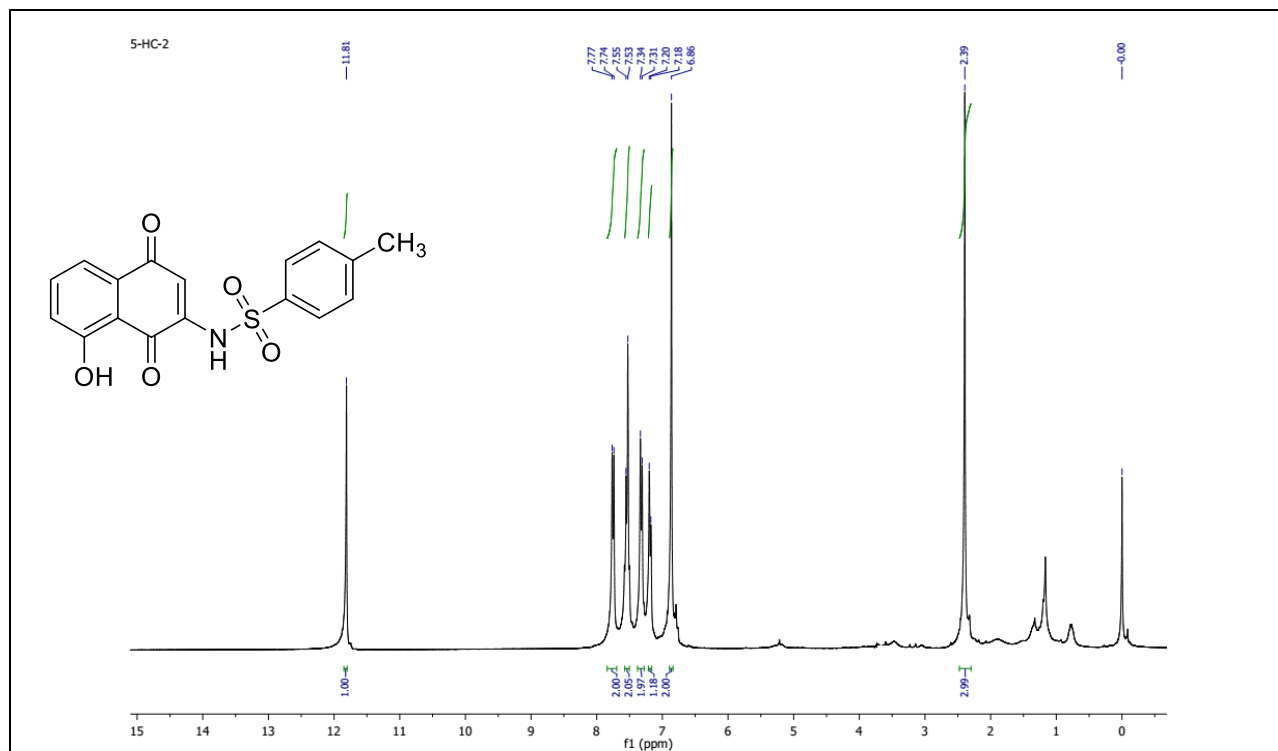

**Fig. 39.** <sup>1</sup>H-NMR spectrum of *N*-(8-hydroxy-1,4-dioxo-1,4-dihydronaphthalen-2-yl)-4-methylbenzenesulfonamide (Table 2, 7).

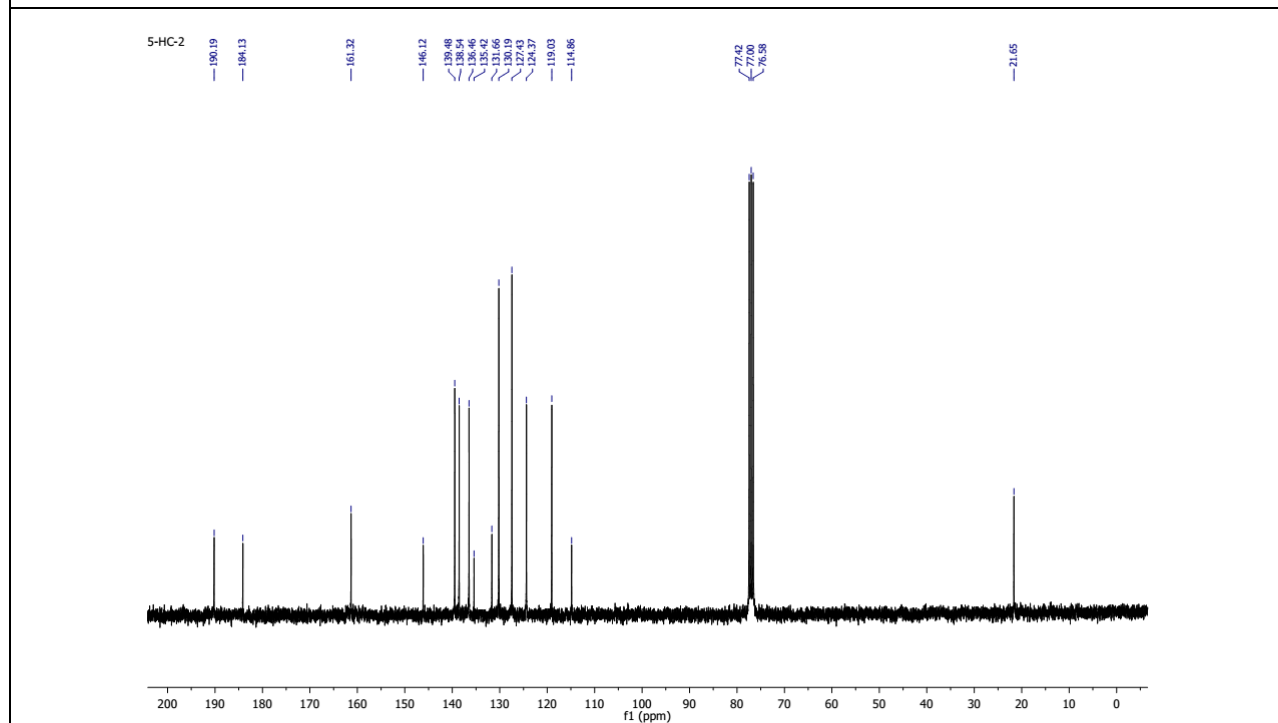

**Fig. 40.** <sup>13</sup>C-NMR spectrum of *N*-(8-Hydroxy-1,4-dioxo-1,4-dihydronaphthalen-2-yl)-4-methylbenzenesulfonamide (Table 2, 7)

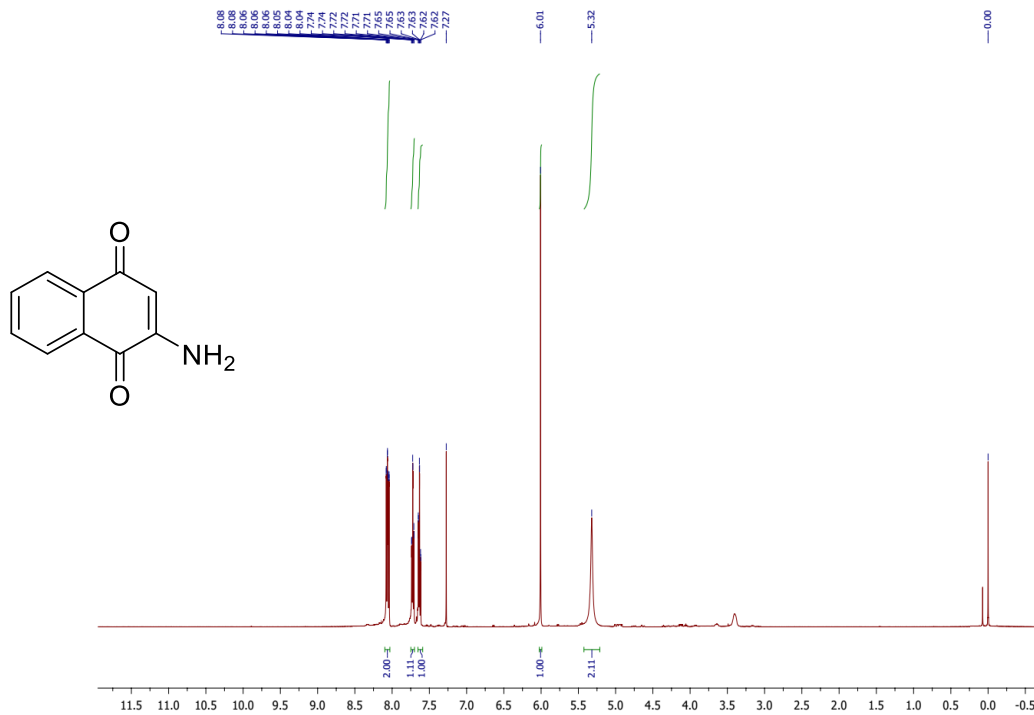

**Fig. 41.** <sup>1</sup>H-NMR spectrum of 2-Aminonaphthalene-1,4-dione (Scheme 1, 8).

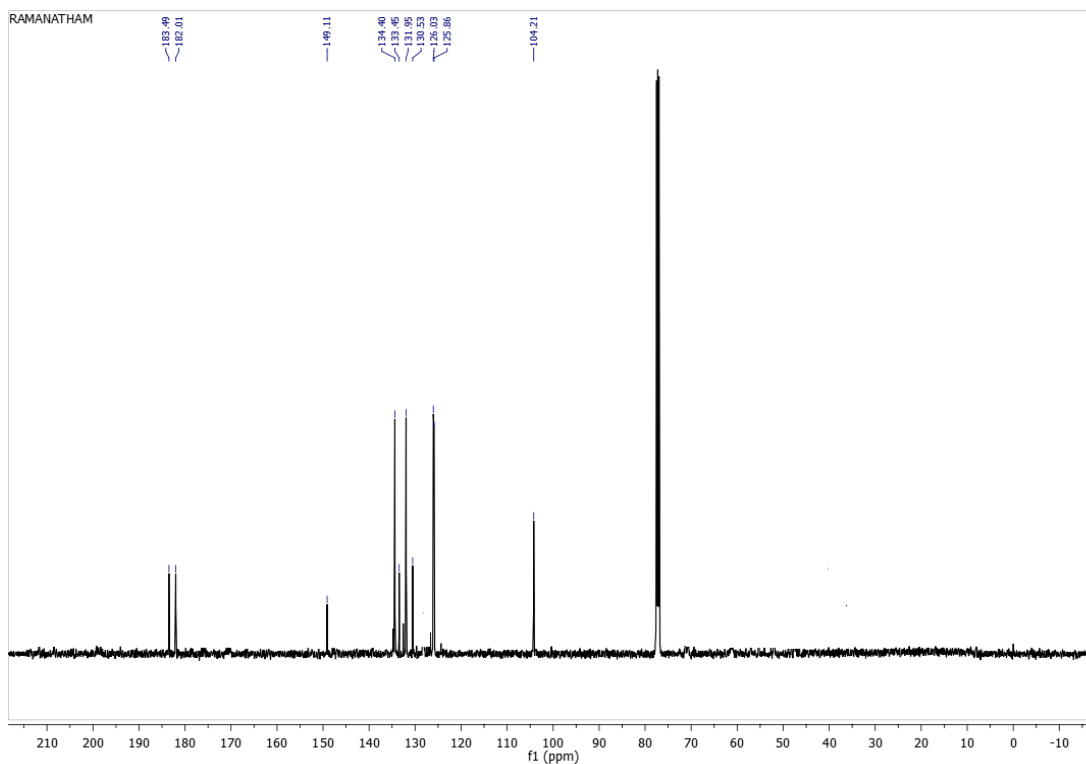

**Fig. 42.** <sup>13</sup>C-NMR spectrum of 2-Aminonaphthalene-1,4-dione (Scheme 1, 8).



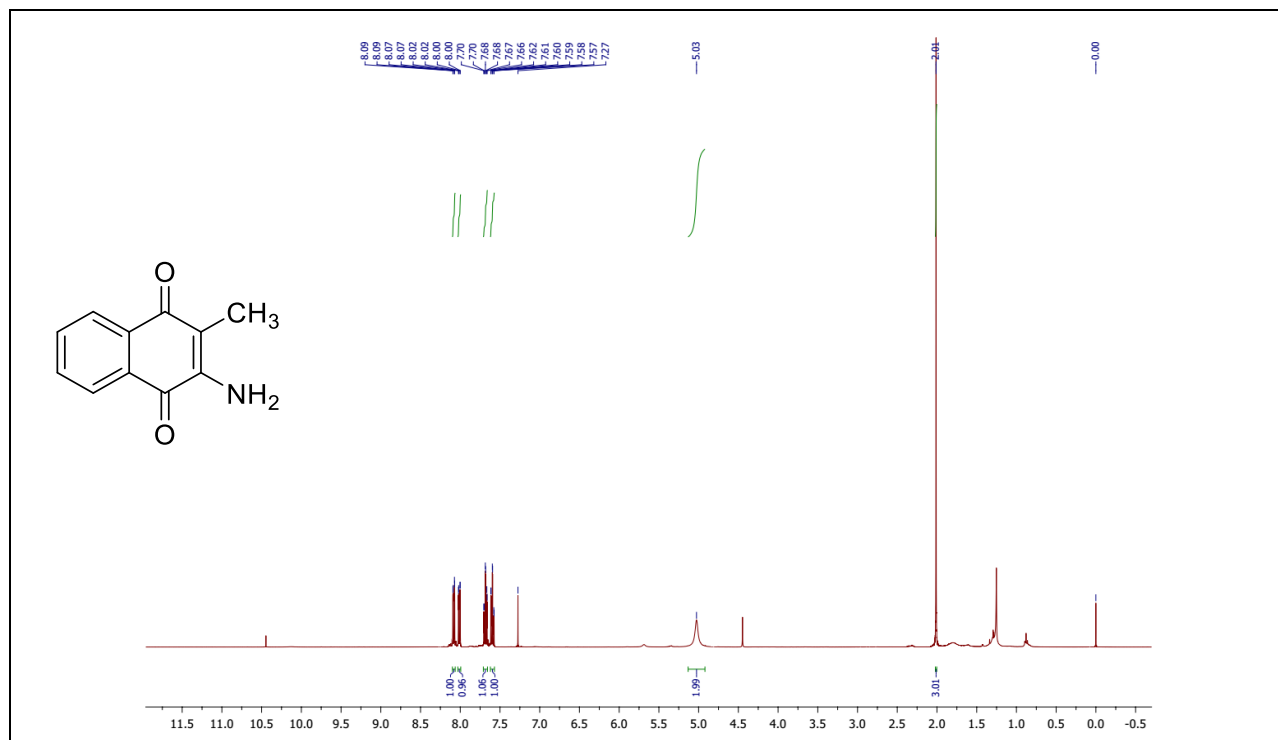

**Fig. 43.** <sup>1</sup>H-NMR spectrum of 2-Amino-3-methylnaphthalene-1,4-dione (Scheme 1, 9).

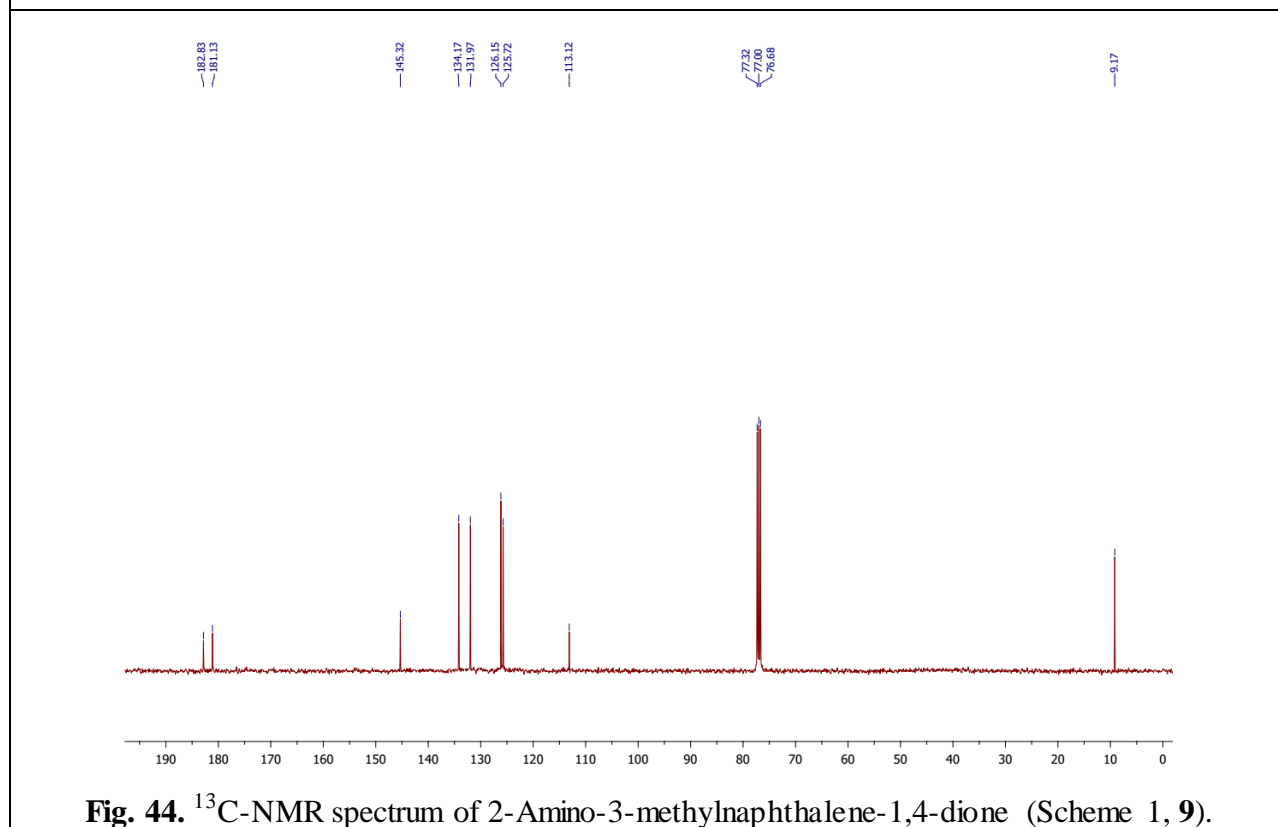

**Fig. 44.** <sup>13</sup>C-NMR spectrum of 2-Amino-3-methylnaphthalene-1,4-dione (Scheme 1, 9).

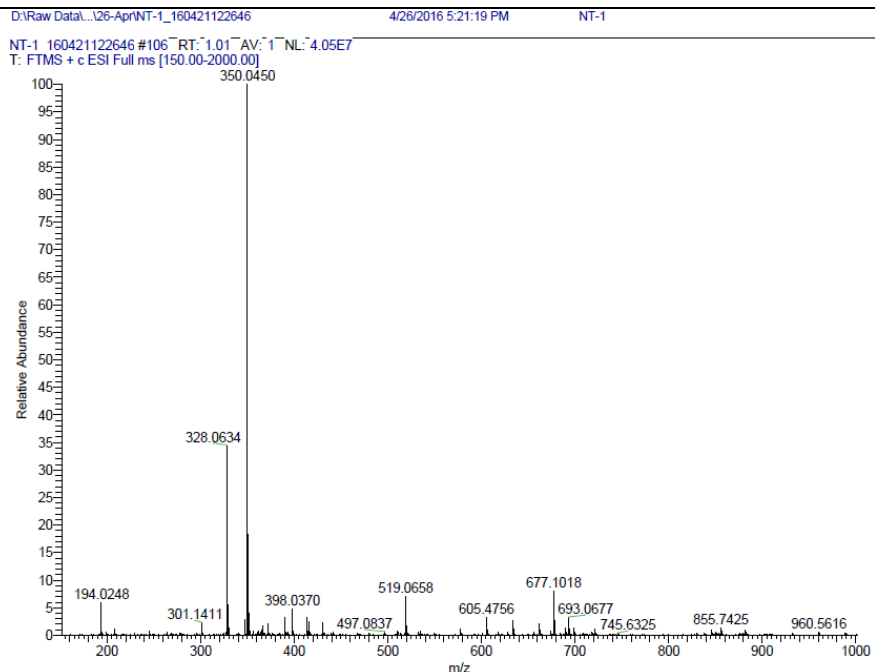

**Fig. 45.** HRMS (ESI)-spectrum of *N*-(1,4-dioxo-1,4-dihydronaphthalen-2-yl)-4-methylbenzenesulfonamide (Table 2, **3a**).

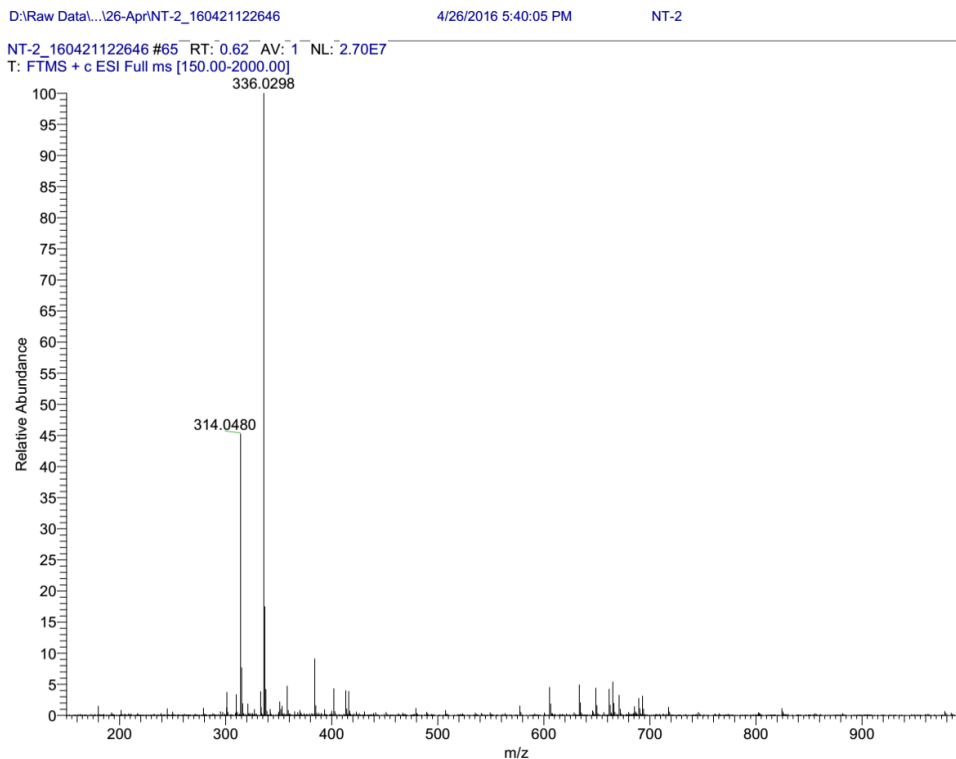

**Fig. 46.** HRMS (ESI)-spectrum of *N*-(1,4-dioxo-1,4-dihydronaphthalen-2-yl)benzenesulfonamide (Table 2, **3b**).

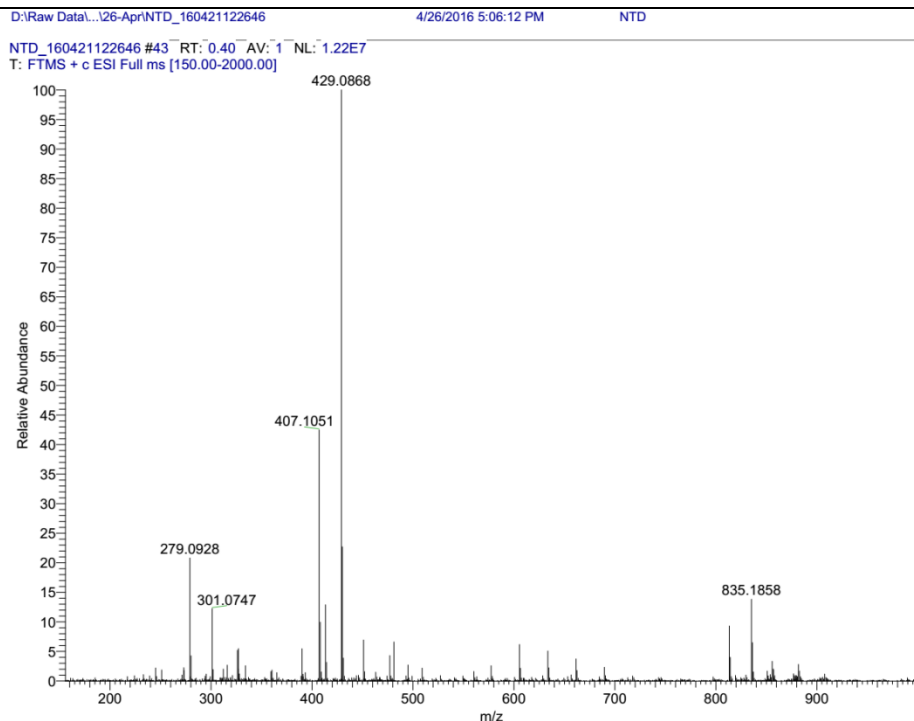

**Fig. 47.** HRMS (ESI)-spectrum of 5-(Dimethylamino)-*N*-(1,4-dioxo-1,4-dihydronaphthalen-2-yl)naphthalene-1-sulfonamide (Table 2, **3g**).

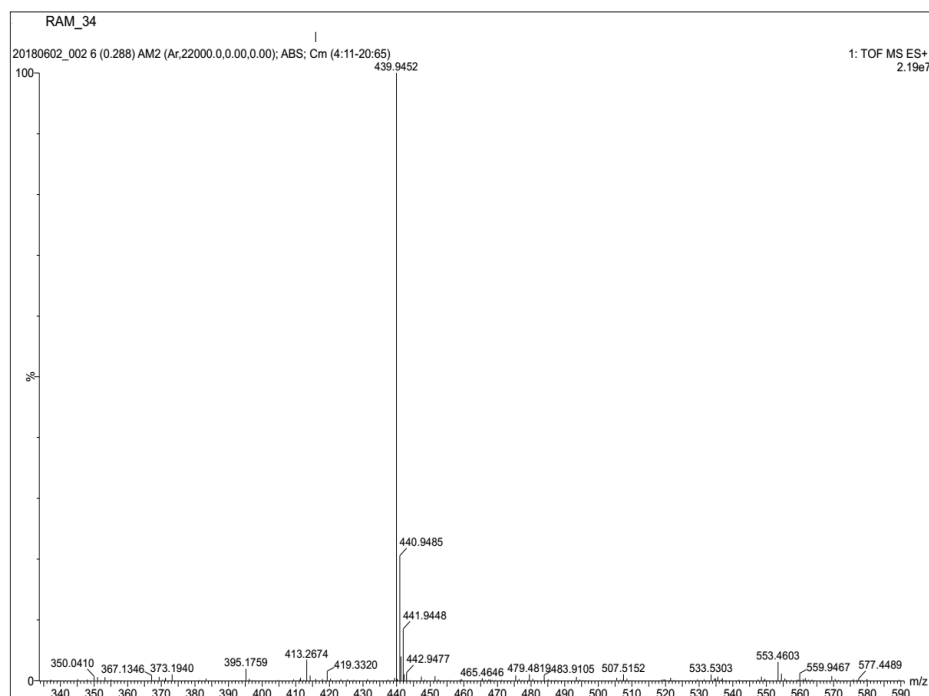

**Fig. 48.** HRMS (ESI)-spectrum of *N*-(1,4-Dioxo-1,4-dihydronaphthalen-2-yl)-4-iodobenzenesulfonamide (Table 2, **3i**).

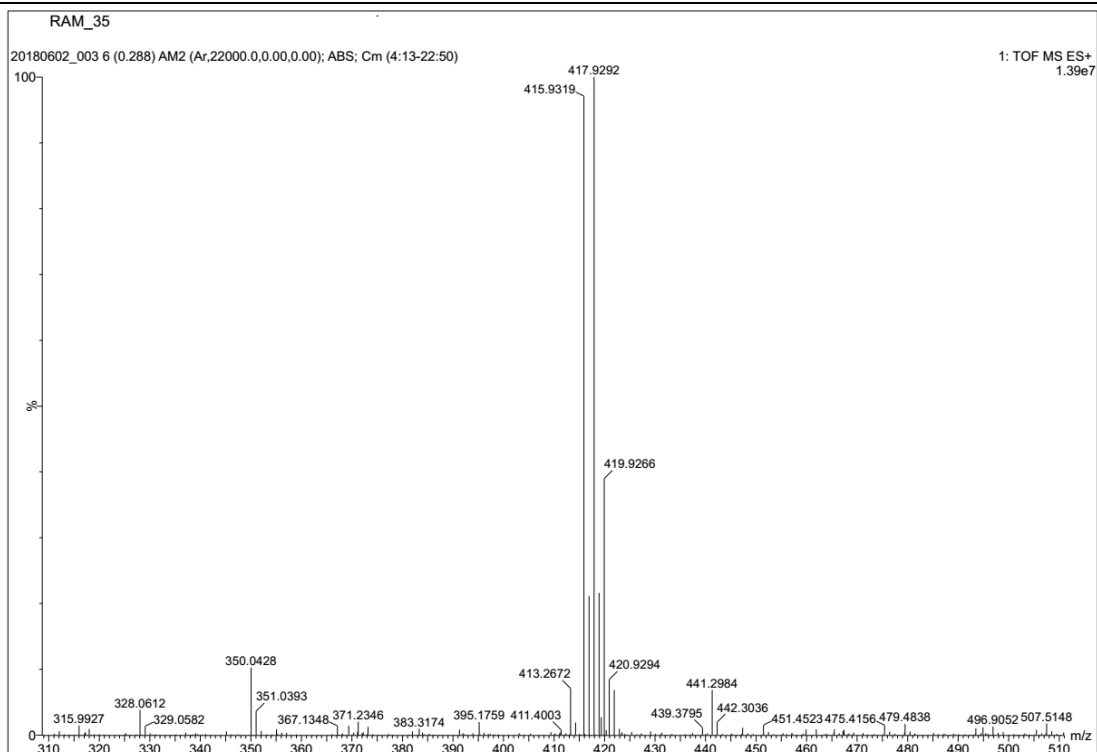

**Fig. 49.** HRMS (ESI)-spectrum of 2,4,5-Trichloro-*N*-(1,4-dioxo-1,4-dihydronaphthalen-2-yl)benzenesulfonamide (Table 2, **3k**).

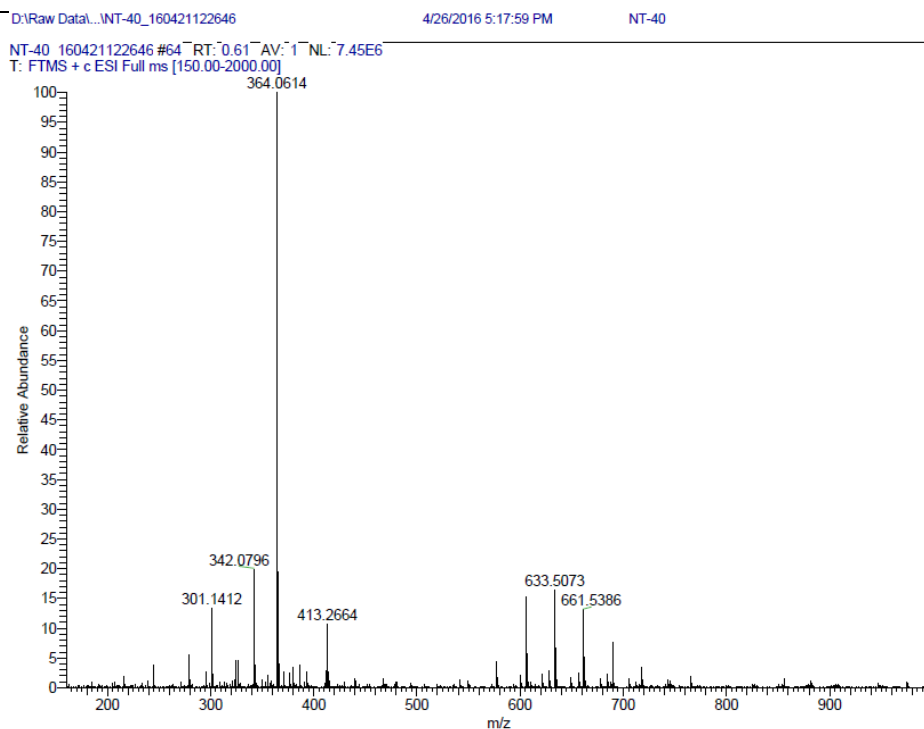

**Fig. 50.** HRMS (ESI)-spectrum of 4-Methyl-*N*-(3-methyl-1,4-dioxo-1,4-dihydronaphthalen-2-yl)benzenesulfonamide (Table 3, **5a**).

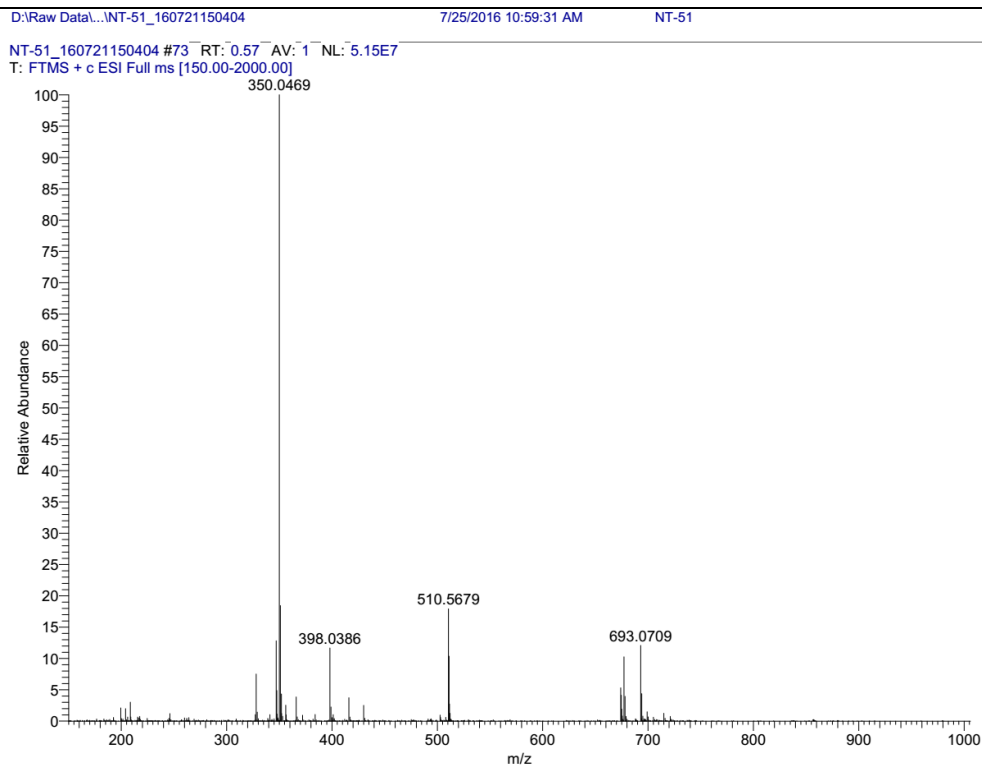

**Fig. 51.** HRMS (ESI)-spectrum of *N*-(3-methyl-1,4-dioxo-1,4-dihydronaphthalen-2-yl)benzenesulfonamide (Table 3, **5b**).

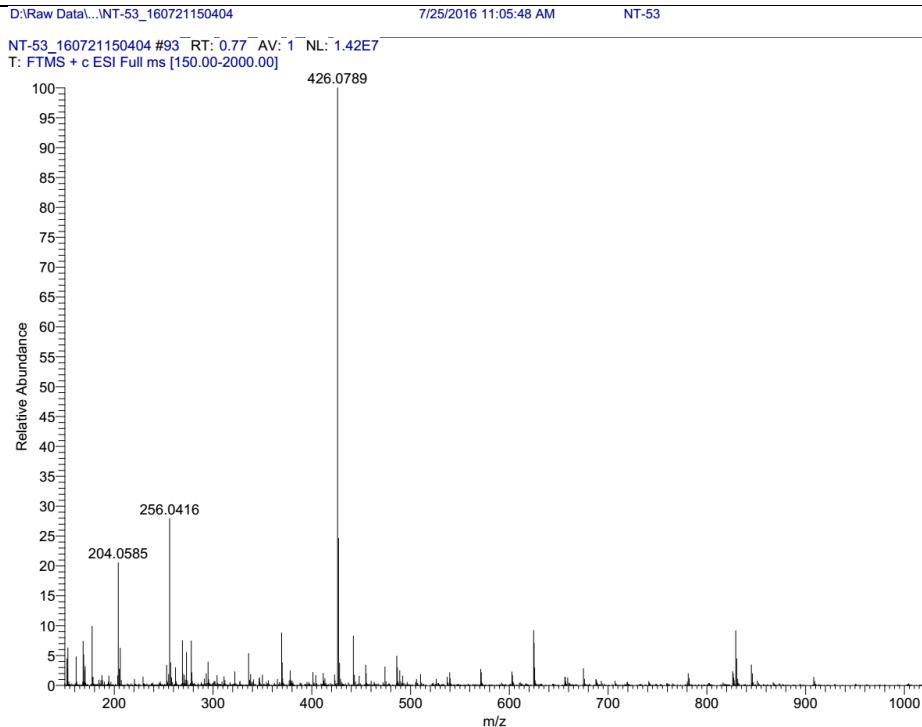

**Fig. 52.** HRMS (ESI)-spectrum of *N*-(3-methyl-1,4-dioxo-1,4-dihydronaphthalen-2-yl)biphenyl-4-sulfonamide (Table 3, **5c**).

## References

- 1 a) R. A. Abramovitch, T. Chellathurai, D. W. Holcomb, T. I. McMaster and D. P. Vanderpool, *J. Org. Chem.***1977**, *42*, 2920; b) R. L. Danheiser, R. F. Miller, R. G. Brisbois and S. Z. Park, *J. Org. Chem.***1990**, *55*, 1959.
